# Supplementary material
Source: publisher site journal article supplement (https://www.spandidos-publications.com/3485/downloadSupplementary)
Supplement: Supplementary file 1 [file downloadSupplementary]

## Sheet: Table SIV
Table SIV. Genes of significantly altered expression by RHOA knockdown
Cell	ProbeName	p-value	[siNeg](raw)	[siRHOA](raw)	[siNeg](normalized)	[siRHOA](normalized)	Fold Change (log)	Fold Change	[siNeg_1](flag)	[siNeg_2](flag)	[siRHOA_1](flag)	[siRHOA_2](flag)	GeneSymbol	Description	GeneName	EntrezGeneID	Go	Chromosome Number_Avadis_	Chromosome Start Index_Avadis_	Chromosome End Index_Avadis_	Chromosome Strand_Avadis_	ControlType	Cytoband	EnsemblID	GenbankAccession	RefSeqAccession	TIGRID	UniGeneID
SW948	A_23_P87013	0.00622905	18.0617	389.068	0	4.36888	4.36888	20.6616	P	P	P	P	TAGLN	Homo sapiens transgelin (TAGLN), transcript variant 1, mRNA [NM_001001522]	transgelin	6876	GO:0005515|GO:0005737|GO:0051015|GO:0007517|GO:0030855	chr11	117074574	117074963	+	FALSE	hs|11q23.3	ENST00000392951	NM_001001522	NM_001001522	THC2537883	Hs.410977
SW948	A_21_P0009781	0.0321989	11.8797	195.957	-1.19209e-07	3.9876	3.9876	15.863	P	P	P	P	UCA1	Homo sapiens urothelial cancer associated 1 (non-protein coding) (UCA1), long non-coding RNA [NR_015379]	urothelial cancer associated 1 (non-protein coding)	652995		chr19	15947002	15947061	+	FALSE	hs|19p13.12	ENST00000397381	NR_015379	NR_015379	THC2492330	Hs.644234
SW948	A_33_P3268304	0.0216741	17.9451	283.195	0	3.95218	3.95218	15.4784	P	P	P	P	LIMS2	Homo sapiens LIM and senescent cell antigen-like domains 2 (LIMS2), transcript variant 5, mRNA [NM_001161404]	LIM and senescent cell antigen-like domains 2	55679	GO:2001046|GO:0043066|GO:0016337|GO:2000178|GO:0005886|GO:0034329|GO:2000346|GO:0008270|GO:0005634|GO:0005925|GO:0045216|GO:0005829	chr2	128396005	128396064	-	FALSE	hs|2q14.3	ENST00000612860	NM_001161404	NM_001161404	NP832991	Hs.469881
SW948	A_23_P87011	0.0408482	37.8284	603.633	0	3.90854	3.90854	15.0171	P	P	P	P	TAGLN	Homo sapiens transgelin (TAGLN), transcript variant 1, mRNA [NM_001001522]	transgelin	6876	GO:0005515|GO:0005737|GO:0051015|GO:0007517|GO:0030855	chr11	117075155	117075214	+	FALSE	hs|11q23.3	ENST00000392951	NM_001001522	NM_001001522	THC2499202	Hs.410977
SW948	A_32_P200238	0.00425165	125.559	1564.2	0	3.61591	3.61591	12.2602	P	P	P	P	UCA1	Homo sapiens urothelial cancer associated 1 (non-protein coding) (UCA1), long non-coding RNA [NR_015379]	urothelial cancer associated 1 (non-protein coding)	652995		chr19	15946035	15946092	+	FALSE	hs|19p13.12	ENST00000589333	NR_015379	NR_015379	THC2471229	Hs.644234
SW948	A_24_P12626	0.0383223	18.7402	203.612	-1.19209e-07	3.47699	3.47699	11.1347	P	P	P	P	CAV1	Homo sapiens caveolin 1, caveolae protein, 22kDa (CAV1), transcript variant 1, mRNA [NM_001753]	caveolin 1, caveolae protein, 22kDa	857	GO:0005515|GO:0043627|GO:0019915|GO:0010524|GO:0030879|GO:0006940|GO:0030301|GO:0005113|GO:0042802|GO:0005622|GO:0016050|GO:0000165|GO:0031397|GO:0032507|GO:0005938|GO:0042632|GO:0005811|GO:0019901|GO:0000122|GO:0019217|GO:0044325|GO:0016504|GO:0043234|GO:0005929|GO:0005887|GO:0007519|GO:0002931|GO:0032570|GO:0006641|GO:0045121|GO:0019899|GO:0005925|GO:0032091|GO:0005886|GO:0005783|GO:0031295|GO:…	chr7	116199001	116199060	+	FALSE	hs|7q31.2	ENST00000451122	NM_001753	NM_001753	NP1154468	Hs.74034
SW948	A_23_P107454	0.0359471	14.0609	149.292	0	3.41904	3.41904	10.6963	P	P	P	P	KRTAP3-1	Homo sapiens keratin associated protein 3-1 (KRTAP3-1), mRNA [NM_031958]	keratin associated protein 3-1	83896	GO:0005198|GO:0045095	chr17	39164843	39164902	-	FALSE	hs|17q21.2	ENST00000580358	NM_031958	NM_031958	THC2488283	Hs.307027
SW948	A_23_P166823	0.0287992	162.866	1419.65	0	3.13239	3.13239	8.76888	P	P	P	P	TNNC1	Homo sapiens troponin C type 1 (slow) (TNNC1), mRNA [NM_003280]	troponin C type 1 (slow)	7134	GO:0005515|GO:0005861|GO:0030049|GO:0055010|GO:0005509|GO:0015629|GO:0060048|GO:0042803|GO:0005829|GO:0005739|GO:0032972|GO:0006937|GO:0031014|GO:0051015|GO:0002086|GO:0031013|GO:0010038|GO:0043462|GO:0005654|GO:0048306	chr3	52485814	52485873	-	FALSE	hs|3p21.1	ENST00000461086	NM_003280	NM_003280	THC2714115	Hs.118845
SW948	A_24_P81900	0.0384744	13.3922	106.275	-1.19209e-07	2.96545	2.96545	7.81067	P	P	P	P	SLC2A3	Homo sapiens solute carrier family 2 (facilitated glucose transporter), member 3 (SLC2A3), mRNA [NM_006931]	solute carrier family 2 (facilitated glucose transporter), member 3	6515	GO:0005886|GO:0005975|GO:0006767|GO:0044281|GO:0055085|GO:0008645|GO:0019852|GO:0015758|GO:0006766|GO:0009405|GO:0016021|GO:0005355|GO:0070062	chr12	8072924	8072983	-	FALSE	hs|12p13.31	ENST00000486749	NM_006931	NM_006931	THC2721000	Hs.419240
SW948	A_32_P47754	0.00937827	96.8945	700.864	0	2.85934	2.85934	7.25683	P	P	P	P	SLC2A14	Homo sapiens solute carrier family 2 (facilitated glucose transporter), member 14 (SLC2A14), transcript variant 1, mRNA [NM_001286233]	solute carrier family 2 (facilitated glucose transporter), member 14	144195	GO:0015758|GO:0007275|GO:0005634|GO:0016021|GO:0007283|GO:0055085|GO:0030154|GO:0005355	chr12	7965203	7965262	-	FALSE	hs|12p13.31	ENST00000431042	NM_001286233	NM_001286233	THC2464691	Hs.655169
SW948	A_24_P20369	0.0339694	29.5913	174.245	0	2.54969	2.54969	5.8551	P	P	P	P	SLC6A20	Homo sapiens solute carrier family 6 (proline IMINO transporter), member 20 (SLC6A20), transcript variant 1, mRNA [NM_020208]	solute carrier family 6 (proline IMINO transporter), member 20	54716	GO:0016324|GO:0015816|GO:0015171|GO:0005886|GO:0005887|GO:0005328|GO:0015824|GO:0006865|GO:0006836|GO:0055085|GO:0003333|GO:0006811	chr3	45797896	45797955	-	FALSE	hs|3p21.31	ENST00000456124	NM_020208	NM_020208	THC2679736	Hs.413095
SW948	A_23_P210425	0.0293221	41.5412	239.853	0	2.53195	2.53195	5.78354	P	P	P	P	MYL9	Homo sapiens myosin, light chain 9, regulatory (MYL9), transcript variant 2, mRNA [NM_181526]	myosin, light chain 9, regulatory	10398	GO:0070527|GO:0030018|GO:0006937|GO:0001725|GO:0006936|GO:0048013|GO:0007411|GO:0005509|GO:0005859|GO:0008307|GO:0005829	chr20	35177541	35177600	+	FALSE	hs|20q11.23	ENST00000346786	NM_181526	NM_181526	THC2598537	Hs.504687
SW948	A_23_P46429	0.00360374	35.8598	200.155	0	2.45883	2.45883	5.49771	P	P	P	P	CYR61	Homo sapiens cysteine-rich, angiogenic inducer, 61 (CYR61), mRNA [NM_001554]	cysteine-rich, angiogenic inducer, 61	3491	GO:0044319|GO:0060710|GO:0060591|GO:0003181|GO:0008283|GO:0010811|GO:0007267|GO:0003281|GO:0002041|GO:0001558|GO:0009653|GO:0030513|GO:0006935|GO:0030198|GO:0045944|GO:0045860|GO:0060716|GO:0060548|GO:0007155|GO:0033690|GO:0070372|GO:0008201|GO:0005520|GO:0003278|GO:0043066|GO:2000304|GO:0030335|GO:0060413|GO:0072593|GO:0050840|GO:0005578|GO:0010518|GO:0001649|GO:0045669|GO:0031012|GO:0043280|GO:…	chr1	86048953	86049012	+	FALSE	hs|1p22.3	ENST00000617517	NM_001554	NM_001554	THC2573914	Hs.8867
SW948	A_23_P19663	0.0150831	10.457	54.4742	0	2.34897	2.34897	5.0946	P	P	P	P	CTGF	Homo sapiens connective tissue growth factor (CTGF), mRNA [NM_001901]	connective tissue growth factor	1490	GO:0060401|GO:0005515|GO:0005801|GO:0010467|GO:0070278|GO:0006367|GO:0045597|GO:0046330|GO:0001558|GO:0005615|GO:0035988|GO:0030154|GO:0043231|GO:0001894|GO:0060548|GO:0070374|GO:0005938|GO:0032355|GO:0044255|GO:0005520|GO:0005794|GO:0034059|GO:0051385|GO:0032330|GO:0043280|GO:0070542|GO:0005178|GO:0001503|GO:0008544|GO:0032967|GO:0007229|GO:0001502|GO:0008543|GO:0051496|GO:0008083|GO:0048471|GO:…	chr6	132270130	132270189	-	FALSE	hs|6q23.2	ENST00000367976	NM_001901	NM_001901	NP095144	Hs.410037
SW948	A_32_P219660	0.0395941	10.8187	51.2923	0	2.25484	2.25484	4.77282	P	P	P	P	SPANXA1	Homo sapiens sperm protein associated with the nucleus, X-linked, family member A1 (SPANXA1), mRNA [NM_013453]	sperm protein associated with the nucleus, X-linked, family member A1	30014	GO:0005737|GO:0005634|GO:0007283	chrX	140678815	140678874	+	FALSE	hs|Xq27.2	ENST00000615379	NM_013453	NM_013453	THC2472061	Hs.334464
SW948	A_22_P00024058	0.0175625	11.5058	48.2544	1.19209e-07	2.04752	2.04752	4.13393	P	P	P	P		Homo sapiens cDNA FLJ38046 fis, clone CTONG2014191. [AK095365]				chr12	3434218	3434277	+	FALSE	hs|12p13.32	ENST00000432994	AK095365		THC2619192	Hs.620311
SW948	A_24_P408736	0.0323922	272.632	1106.05	0	2.01357	2.01357	4.0378	P	P	P	P	GALNT5	Homo sapiens polypeptide N-acetylgalactosaminyltransferase 5 (GALNT5), mRNA [NM_014568]	polypeptide N-acetylgalactosaminyltransferase 5	11227	GO:0004653|GO:0006493|GO:0000139|GO:0030246|GO:0016266|GO:0016021|GO:0005575|GO:0044267|GO:0046872|GO:0006024|GO:0043687	chr2	158157498	158162306	+	FALSE	hs|2q24.1	ENST00000259056	NM_014568	NM_014568	THC2473222	Hs.269027
SW948	A_23_P214821	0.0441784	67.7213	270.331	0	1.98103	1.98103	3.94775	P	P	P	P	EDN1	Homo sapiens endothelin 1 (EDN1), transcript variant 1, mRNA [NM_001955]	endothelin 1	1906	GO:0005515|GO:0019722|GO:0005615|GO:0006885|GO:0019229|GO:0007507|GO:0001516|GO:0014032|GO:0015758|GO:0032496|GO:0003100|GO:0031583|GO:0030335|GO:0043179|GO:0010193|GO:0030593|GO:0035994|GO:0044321|GO:0000122|GO:0001701|GO:0005125|GO:0014065|GO:0032269|GO:0010595|GO:0007186|GO:0005179|GO:0035815|GO:0016049|GO:0010460|GO:0035810|GO:0030072|GO:0008284|GO:0042482|GO:0030818|GO:0007267|GO:0010259|GO:…	chr6	12296672	12296731	+	FALSE	hs|6p24.1	ENST00000379375	NM_001955	NM_001955	THC2464104	Hs.511899
SW948	A_24_P379233	0.0262822	146.051	553.333	0	1.91024	1.91024	3.75873	P	P	P	P	GJB3	Homo sapiens gap junction protein, beta 3, 31kDa (GJB3), transcript variant 1, mRNA [NM_024009]	gap junction protein, beta 3, 31kDa	2707	GO:0005737|GO:0005243|GO:0007154|GO:0007605|GO:0005921|GO:0043588|GO:0005922|GO:0016021|GO:0001890|GO:0055085|GO:0001701	chr1	35251266	35251325	+	FALSE	hs|1p34.3	ENST00000373366	NM_024009	NM_024009	THC2472470	Hs.522561
SW948	A_24_P339944	0.0480977	17.6804	65.0892	0	1.88395	1.88395	3.69084	P	P	P	P	PDGFB	Homo sapiens platelet-derived growth factor beta polypeptide (PDGFB), transcript variant 1, mRNA [NM_002608]	platelet-derived growth factor beta polypeptide	5155	GO:0005515|GO:0005518|GO:0005615|GO:0042803|GO:0042802|GO:0007507|GO:0043552|GO:0007173|GO:0018105|GO:0030198|GO:0007179|GO:0032355|GO:0035793|GO:0032868|GO:0030336|GO:0030335|GO:0045743|GO:0009986|GO:0045740|GO:0010512|GO:0001892|GO:0030168|GO:0045840|GO:0014068|GO:0018108|GO:0005161|GO:0042056|GO:0043536|GO:0008543|GO:0045087|GO:0030031|GO:0005788|GO:0016049|GO:0045892|GO:0008083|GO:0038095|GO:…	chr22	39620099	39620158	-	FALSE	hs|22q13.1	ENST00000331163	NM_002608	NM_002608	NP1151998	Hs.1976
SW948	A_33_P3246833	0.0218513	185.246	676.398	0	1.8417	1.8417	3.58433	P	P	P	P	IL1RN	Homo sapiens interleukin 1 receptor antagonist (IL1RN), transcript variant 4, mRNA [NM_173843]	interleukin 1 receptor antagonist	3557	GO:0006629|GO:0002439|GO:0005886|GO:0014050|GO:0045352|GO:0045353|GO:0005152|GO:0005615|GO:0005151|GO:0005150|GO:0005622|GO:0005737|GO:0006955|GO:0042594|GO:0001960|GO:0070670|GO:0001660|GO:0032496|GO:0034115|GO:0007613|GO:0043507|GO:0070555|GO:0070062|GO:0014823|GO:0043066|GO:0005149|GO:0007565|GO:0030336|GO:2000660|GO:0042493|GO:0051384|GO:0006953|GO:0005125|GO:0019233|GO:0045837|GO:0071874|GO:…	chr2	113891531	113891590	+	FALSE	hs|2q13	ENST00000259206	NM_173843	NM_173843	THC2498493	Hs.81134
SW948	A_23_P47924	0.0044506	111.628	400.115	0	1.81625	1.81625	3.52164	P	P	P	P	PTPRR	Homo sapiens protein tyrosine phosphatase, receptor type, R (PTPRR), transcript variant 1, mRNA [NM_002849]	protein tyrosine phosphatase, receptor type, R	5801	GO:0005515|GO:0048471|GO:0005886|GO:0019901|GO:0001701|GO:0005615|GO:0035335|GO:0006470|GO:0005001|GO:0070373|GO:0016021|GO:0038128|GO:0004725|GO:0010633	chr12	71032496	71032555	-	FALSE	hs|12q15	ENST00000283228	NM_002849	NM_002849	NP091230	Hs.506076
SW948	A_33_P3351279	0.0256499	8.09906	29.109	-1.19209e-07	1.81214	1.81214	3.51164	P	P	P	P	GPR37L1	Homo sapiens G protein-coupled receptor 37 like 1 (GPR37L1), mRNA [NM_004767]	G protein-coupled receptor 37 like 1	9283	GO:0048712|GO:0043235|GO:0005515|GO:0042277|GO:0045665|GO:0005886|GO:0021940|GO:0008528|GO:0045879|GO:0016021|GO:0043410|GO:0007193	chr1	202098575	202098634	+	FALSE	hs|1q32.1	ENST00000367282	NM_004767	NM_004767	THC2464423	Hs.132049
SW948	A_24_P305933	0.00358672	77.3211	275.291	0	1.80638	1.80638	3.49765	P	P	P	P	TMCC3	Homo sapiens transmembrane and coiled-coil domain family 3 (TMCC3), transcript variant 1, mRNA [NM_020698]	transmembrane and coiled-coil domain family 3	57458	GO:0016021	chr12	94962674	94962733	-	FALSE	hs|12q22	ENST00000261226	NM_020698	NM_020698	THC2675686	Hs.370410
SW948	A_22_P00010119	0.0381698	7.26272	24.916	1.19209e-07	1.73805	1.73804	3.33583	P	P	P	P	lnc-MRP63-6	LNCipedia lincRNA (lnc-MRP63-6), lincRNA [lnc-MRP63-6:1]	lnc-MRP63-6:1			chr13	21948220	21948279	+	FALSE	hs|13q12.11				THC2633977
SW948	A_22_P00013724	0.0387828	13.4673	44.9412	-1.19209e-07	1.73386	1.73386	3.32616	P	P	P	P	lnc-RP11-817J15.3.1-2	BX090933 Soares_NFL_T_GBC_S1 Homo sapiens cDNA clone IMAGp998A063864 ; IMAGE:1525901, mRNA sequence [BX090933]	lnc-RP11-817J15.3.1-2:1			chr11	102478124	102478183	+	FALSE	hs|11q22.2		BX090933		THC2666092	Hs.738355
SW948	A_23_P79108	0.00831185	86.8507	286.019	0	1.68032	1.68032	3.205	P	P	P	P	ATP8B3	Homo sapiens ATPase, aminophospholipid transporter, class I, type 8B, member 3 (ATP8B3), transcript variant 1, mRNA [NM_138813]	ATPase, aminophospholipid transporter, class I, type 8B, member 3	148229	GO:0005794|GO:0000287|GO:0005886|GO:0005783|GO:0008152|GO:0004012|GO:0007030|GO:0016021|GO:0007339|GO:0005524|GO:0002080|GO:0045332	chr19	1782083	1782142	-	FALSE	hs|19p13.3	ENST00000531925	NM_138813	NM_138813	THC2479715	Hs.306212
SW948	A_24_P686965	0.00229483	217.473	703.295	0	1.66843	1.66843	3.17869	P	P	P	P	SH2D5	Homo sapiens SH2 domain containing 5 (SH2D5), transcript variant 1, mRNA [NM_001103161]	SH2 domain containing 5	400745	GO:0030054|GO:0045211|GO:0014069	chr1	21046262	21046321	-	FALSE	hs|1p36.12	ENST00000375031	NM_001103161	NM_001103161	THC2473200	Hs.591522
SW948	A_21_P0013917	0.0154593	56.9179	178.846	0	1.63019	1.63019	3.09554	P	P	P	P	NT5DC4	5'-nucleotidase domain containing 4 [Source:HGNC Symbol;Acc:HGNC:27678] [ENST00000497526]	5'-nucleotidase domain containing 4	284958	GO:0016311|GO:0008253|GO:0046872	chr2	113489188	113489247	+	FALSE	hs|2q13	ENST00000497526	AK092780		THC2622135	Hs.589714
SW948	A_33_P3252800	0.0128521	35.9941	109.871	0	1.58973	1.58973	3.00993	P	P	P	P	PTPRR	Homo sapiens protein tyrosine phosphatase, receptor type, R (PTPRR), transcript variant 1, mRNA [NM_002849]	protein tyrosine phosphatase, receptor type, R	5801	GO:0005515|GO:0048471|GO:0005886|GO:0019901|GO:0001701|GO:0005615|GO:0035335|GO:0006470|GO:0005001|GO:0070373|GO:0016021|GO:0038128|GO:0004725|GO:0010633	chr12	71050485	71050544	-	FALSE	hs|12q15	ENST00000549107	NM_002849	NM_002849	NP091230	Hs.506076
SW948	A_23_P144005	0.0491399	34.6105	104.774	0	1.57162	1.57162	2.97239	P	P	P	P	SSUH2	Homo sapiens ssu-2 homolog (C. elegans) (SSUH2), transcript variant 3, mRNA [NM_015931]	ssu-2 homolog (C. elegans)	51066	GO:0005737	chr3	8661343	8661402	-	FALSE	hs|3p26.1	ENST00000415132	NM_015931	NM_015931	NP1200688	Hs.740735
SW948	A_23_P103110	0.012991	91.9335	262.526	0	1.50625	1.50625	2.84071	P	P	P	P	MAFF	Homo sapiens v-maf avian musculoaponeurotic fibrosarcoma oncogene homolog F (MAFF), transcript variant 1, mRNA [NM_012323]	v-maf avian musculoaponeurotic fibrosarcoma oncogene homolog F	23764	GO:0043565|GO:0006355|GO:0003700|GO:0007567|GO:0006366|GO:0007596|GO:0005654|GO:0045604|GO:0035914|GO:0001701	chr22	38611984	38612043	+	FALSE	hs|22q13.1	ENST00000538320	NM_012323	NM_012323	THC2466913	Hs.517617
SW948	A_23_P201248	0.0166504	44.6871	128.706	0	1.49996	1.49996	2.82835	P	P	P	P	SLC26A9	Homo sapiens solute carrier family 26 (anion exchanger), member 9 (SLC26A9), transcript variant 1, mRNA [NM_052934]	solute carrier family 26 (anion exchanger), member 9	115019	GO:0006820|GO:0006821|GO:0005886|GO:0009986|GO:0055085|GO:0005254|GO:0006885|GO:0010628|GO:0016324|GO:0015301|GO:0015106|GO:0051117|GO:0008271|GO:0015701|GO:0016021|GO:0070062|GO:0006811	chr1	205882365	205882424	-	FALSE	hs|1q32.1	ENST00000367134	NM_052934	NM_052934	THC2476572	Hs.164073
SW948	A_23_P149281	0.017649	126.044	356.312	0	1.48208	1.48208	2.79351	P	P	P	P	EPHA2	Homo sapiens EPH receptor A2 (EPHA2), mRNA [NM_004431]	EPH receptor A2	1969	GO:0051898|GO:0005515|GO:0033628|GO:0005886|GO:0014028|GO:0010591|GO:0005003|GO:0046849|GO:0007411|GO:0016032|GO:0070309|GO:0007155|GO:0070372|GO:0060035|GO:0031256|GO:0048013|GO:0031258|GO:0008630|GO:0009986|GO:0030316|GO:0045765|GO:0032587|GO:0007275|GO:0018108|GO:0001525|GO:0070848|GO:0032863|GO:0005524|GO:0001649|GO:0043535|GO:0033598|GO:0001501|GO:0016477|GO:0060326|GO:0005887|GO:0030216|GO:…	chr1	16451800	16455972	-	FALSE	hs|1p36.13	ENST00000611929	NM_004431	NM_004431	THC2467358	Hs.171596
SW948	A_33_P3262560	0.0376982	29.8291	84.8173	0	1.47465	1.47465	2.77917	P	P	P	P	LAMA3	Homo sapiens laminin, alpha 3 (LAMA3), transcript variant 6, non-coding RNA [NR_130106]	laminin, alpha 3	3909	GO:0030334|GO:0034329|GO:0005102|GO:0005606|GO:0005576|GO:0035987|GO:0030155|GO:0005604|GO:0045995|GO:0005610|GO:0008544|GO:0022617|GO:0005198|GO:0030198|GO:0031581|GO:0007155|GO:0070062	chr18	21375992	21376051	+	FALSE	hs|18q11.2	ENST00000585600	NR_130106	NR_130106	NP708354	Hs.436367
SW948	A_33_P3376249	0.014397	450.716	1245.3	0	1.45622	1.45622	2.74389	P	P	P	P	S100A2	Homo sapiens S100 calcium binding protein A2 (S100A2), mRNA [NM_005978]	S100 calcium binding protein A2	6273	GO:0005515|GO:0043542|GO:0005509|GO:0005575|GO:0042802	chr1	153533831	153533890	-	FALSE	hs|1q21.3	ENST00000368709	NM_005978	NM_005978	THC2789199	Hs.516484
SW948	A_23_P214969	0.0296289	119.655	317.625	0	1.37761	1.37761	2.59838	P	P	P	P	CITED2	Homo sapiens Cbp/p300-interacting transactivator, with Glu/Asp-rich carboxy-terminal domain, 2 (CITED2), transcript variant 1, mRNA [NM_006079]	Cbp/p300-interacting transactivator, with Glu/Asp-rich carboxy-terminal domain, 2	10370	GO:0005515|GO:0043627|GO:0000790|GO:0007368|GO:0003700|GO:0008283|GO:0034405|GO:0005634|GO:0070986|GO:0048536|GO:0030154|GO:0007530|GO:0007507|GO:0005737|GO:0035360|GO:0045944|GO:1900164|GO:0060971|GO:0035802|GO:0030511|GO:0035035|GO:0001666|GO:0043066|GO:0030336|GO:0022409|GO:0001106|GO:0060412|GO:0003714|GO:0003713|GO:0003156|GO:0000122|GO:0061428|GO:0050693|GO:0045787|GO:0003151|GO:0006351|GO:…	chr6	139693592	139693651	-	FALSE	hs|6q24.1	ENST00000536159	NM_006079	NM_006079	THC2468190	Hs.82071
SW948	A_24_P843020	0.0115115	15.683	40.8866	1.19209e-07	1.3617	1.3617	2.56988	P	P	P	P						chr19	42006930	42006989	-	FALSE	hs|19q13.2				THC2767512
SW948	A_24_P87036	0.0213278	20.867	54.2717	0	1.35019	1.35019	2.54947	P	P	P	P	ANO1	Homo sapiens anoctamin 1, calcium activated chloride channel (ANO1), transcript variant 1, mRNA [NM_018043]	anoctamin 1, calcium activated chloride channel	55107	GO:0005515|GO:0006821|GO:0046982|GO:0005886|GO:0034707|GO:0007275|GO:0055085|GO:0042803|GO:0005737|GO:0016324|GO:0034220|GO:0042391|GO:0005229|GO:0005227|GO:0006812|GO:0009897|GO:0070062	chr11	70035233	70035292	+	FALSE	hs|11q13.3	ENST00000530676	NM_018043	NM_018043	THC2482452	Hs.503074
SW948	A_33_P3366391	0.0386599	31.8293	82.2125	0	1.34901	1.34901	2.54738	P	P	P	P		keratin 18 pseudogene 59 [Source:HGNC Symbol;Acc:HGNC:48886] [ENST00000534728]				chr11	124984692	124984751	+	FALSE	hs|11q24.2	ENST00000534728			THC2488140	Hs.640102
SW948	A_23_P90172	0.0131346	107.709	276.3	0	1.33576	1.33576	2.52408	P	P	P	P	PPP1R15A	Homo sapiens protein phosphatase 1, regulatory subunit 15A (PPP1R15A), mRNA [NM_014330]	protein phosphatase 1, regulatory subunit 15A	23645	GO:0005515|GO:0005783|GO:0005741|GO:0005829|GO:0030968|GO:0005739|GO:0008599|GO:0005737|GO:0033138|GO:0045943|GO:0000164|GO:0071862|GO:0007179|GO:0007050|GO:0030512|GO:0005794|GO:0019901|GO:0035308|GO:0006915|GO:0070972|GO:0006974|GO:0010628|GO:0032058|GO:0016020|GO:0005789|GO:0032516|GO:0032515|GO:0008157	chr19	49378127	49378901	+	FALSE	hs|19q13.33	ENST00000200453	NM_014330	NM_014330	THC2584464	Hs.631593
SW948	A_33_P3382399	0.0416547	33.941	87.053	0	1.32588	1.32588	2.50685	P	P	P	P	KRTAP3-1	Homo sapiens keratin associated protein 3-1 (KRTAP3-1), mRNA [NM_031958]	keratin associated protein 3-1	83896	GO:0005198|GO:0045095	chr17	39165030	39165089	-	FALSE	hs|17q21.2	ENST00000580358	NM_031958	NM_031958	THC2488283	Hs.307027
SW948	A_23_P30254	0.0487098	331.187	835.999	0	1.31606	1.31606	2.48986	P	P	P	P	PLK2	Homo sapiens polo-like kinase 2 (PLK2), transcript variant 1, mRNA [NM_006622]	polo-like kinase 2	10769	GO:0005515|GO:0007093|GO:0032436|GO:0007265|GO:0060291|GO:0060292|GO:0046599|GO:0032403|GO:0030425|GO:0032092|GO:0005622|GO:0000082|GO:0048167|GO:0007613|GO:0004871|GO:0061000|GO:0007052|GO:0043123|GO:0005813|GO:0043066|GO:0032486|GO:0005814|GO:0005524|GO:0004674|GO:0006468	chr5	57749993	57750052	-	FALSE	hs|5q11.2	ENST00000617412	NM_006622	NM_006622	THC2583736	Hs.398157
SW948	A_23_P59637	0.0483814	178.278	438.939	0	1.28917	1.28917	2.44387	P	P	P	P	DOCK4	Homo sapiens dedicator of cytokinesis 4 (DOCK4), mRNA [NM_014705]	dedicator of cytokinesis 4	9732	GO:0005515|GO:0030971|GO:0017124|GO:0007264|GO:0032420|GO:0032421|GO:0030165|GO:0032855|GO:0005829|GO:0012505|GO:0005085|GO:0048365|GO:0016020|GO:0060326|GO:0030675	chr7	111366266	111366325	-	FALSE	hs|7q31.1		NM_014705	NM_014705	THC2601425	Hs.654652
SW948	A_21_P0004397	0.00373004	7.96163	19.5623	-1.19209e-07	1.27248	1.27248	2.41577	P	P	P	P	lnc-ACTBL2-1	DA037643 BGGI11 Homo sapiens cDNA clone BGGI11000600 5', mRNA sequence [DA037643]	lnc-ACTBL2-1:1			chr5	56593591	56595059	-	FALSE	hs|5q11.2					Hs.573177
SW948	A_32_P61684	0.0270351	58.3774	142.235	0	1.2689	1.2689	2.40978	P	P	P	P	PAG1	Homo sapiens phosphoprotein membrane anchor with glycosphingolipid microdomains 1 (PAG1), mRNA [NM_018440]	phosphoprotein membrane anchor with glycosphingolipid microdomains 1	55824	GO:0005515|GO:0050852|GO:0050863|GO:0005886|GO:0050868|GO:0009967|GO:0035556|GO:0007165|GO:0007173|GO:0005070|GO:0045121|GO:0016021|GO:0042169	chr8	81880233	81880292	-	FALSE	hs|8q21.13	ENST00000220597	NM_018440	NM_018440	THC2517459	Hs.266175
SW948	A_23_P352426	0.0359749	7.2044	17.7566	1.19209e-07	1.25265	1.25265	2.38279	P	P	P	P	CDRT1	Homo sapiens CMT1A duplicated region transcript 1 (CDRT1), transcript variant 1, mRNA [NM_006382]	CMT1A duplicated region transcript 1	374286	GO:0008150|GO:0003674|GO:0005575	chr17	15492046	15492105	-	FALSE	hs|17p12	ENST00000395906	NM_006382	NM_006382	THC2486212	Hs.632233
SW948	A_23_P83403	0.0447986	23.6287	57.103	0	1.25102	1.25102	2.3801	P	P	P	P	LIMCH1	Homo sapiens LIM and calponin homology domains 1 (LIMCH1), transcript variant 1, mRNA [NM_014988]	LIM and calponin homology domains 1	22998	GO:0031032|GO:0008270|GO:0003779	chr4	41694344	41699178	+	FALSE	hs|4p13	ENST00000511496	NM_014988	NM_014988	NP1403936	Hs.335163
SW948	A_24_P14464	0.0328243	15.4066	37.1631	0	1.24183	1.24183	2.36498	P	P	P	P	WFDC2	Homo sapiens WAP four-disulfide core domain 2 (WFDC2), mRNA [NM_006103]	WAP four-disulfide core domain 2	10406	GO:0010951|GO:0019828|GO:0004869|GO:0004866|GO:0004867|GO:0006508|GO:0007283|GO:0005615|GO:0070062	chr20	44099078	44099137	+	FALSE	hs|20q13.12	ENST00000372676	NM_006103	NM_006103	THC2490004	Hs.2719
SW948	A_23_P127948	0.0279038	1668.1	3932.36	0	1.22501	1.22501	2.33757	P	P	P	P	ADM	Homo sapiens adrenomedullin (ADM), mRNA [NM_001124]	adrenomedullin	133	GO:0005515|GO:0008284|GO:0031700|GO:0008285|GO:2001214|GO:0006701|GO:0060712|GO:0031102|GO:0008015|GO:0060670|GO:0031100|GO:0030819|GO:0009409|GO:0007267|GO:0005615|GO:0007204|GO:0031623|GO:0007507|GO:0005737|GO:0048589|GO:0042594|GO:0045906|GO:0045909|GO:0032496|GO:0042475|GO:0006171|GO:0032868|GO:0001666|GO:0007565|GO:0043065|GO:0008209|GO:0007568|GO:0005102|GO:0009611|GO:0001843|GO:0051384|GO:…	chr11	10328780	10328839	+	FALSE	hs|11p15.4	ENST00000528655	NM_001124	NM_001124	THC2591417	Hs.441047
SW948	A_32_P231617	0.0313343	531.103	1254.88	0	1.22236	1.22236	2.33329	P	P	P	P	TM4SF1	Homo sapiens transmembrane 4 L six family member 1 (TM4SF1), mRNA [NM_014220]	transmembrane 4 L six family member 1	4071	GO:0008150|GO:0003674|GO:0005887	chr3	149093343	149093493	-	FALSE	hs|3q25.1	ENST00000622124	NM_014220	NM_014220	NP099261	Hs.351316
SW948	A_33_P3330264	0.0447983	38.9716	90.7242	0	1.19972	1.19972	2.29696	P	P	P	P	CXCL1	Homo sapiens chemokine (C-X-C motif) ligand 1 (melanoma growth stimulating activity, alpha) (CXCL1), transcript variant 1, mRNA [NM_001511]	chemokine (C-X-C motif) ligand 1 (melanoma growth stimulating activity, alpha)	2919	GO:0008009|GO:0070098|GO:0030036|GO:0008285|GO:0008283|GO:0005102|GO:0005576|GO:0045236|GO:0043085|GO:0005615|GO:0002690|GO:0007399|GO:0035556|GO:0007165|GO:0006955|GO:0006954|GO:0006935|GO:0007186|GO:0060326|GO:0032496|GO:0008047|GO:0008083	chr4	74735646	74735705	+	FALSE	hs|4q13.3	ENST00000395761	NM_001511	NM_001511	THC2623760	Hs.789
SW948	A_21_P0003681	0.0183444	8.54399	19.9456	0	1.19949	1.19949	2.29658	P	P	P	P	lnc-CEP44-1	LNCipedia lincRNA (lnc-CEP44-1), lincRNA [lnc-CEP44-1:2]	lnc-CEP44-1:2			chr4	175445565	175445624	+	FALSE	hs|4q34.1
SW948	A_24_P125283	0.0151094	141.48	330.695	0	1.19121	1.19121	2.28345	P	P	P	P	HDAC5	Homo sapiens histone deacetylase 5 (HDAC5), transcript variant 3, mRNA [NM_001015053]	histone deacetylase 5	10014	GO:0005515|GO:0006342|GO:0044212|GO:0006325|GO:0010830|GO:0046970|GO:0005634|GO:0010832|GO:0042220|GO:0046872|GO:0005829|GO:0007507|GO:0051091|GO:0005737|GO:0006954|GO:0007219|GO:0045944|GO:0070491|GO:0030183|GO:0005080|GO:0090051|GO:0006338|GO:0004407|GO:0046969|GO:0032041|GO:0070932|GO:0070933|GO:0032869|GO:0016575|GO:0005794|GO:0042493|GO:0003714|GO:0048742|GO:0043393|GO:0001047|GO:0033555|GO:…	chr17	42154164	42154223	-	FALSE	hs|17q21.31	ENST00000225983	NM_001015053	NM_001015053	THC2465832	Hs.438782
SW948	A_23_P166686	0.0365881	1201.54	2721.19	0	1.15278	1.15278	2.22341	P	P	P	P	AMOTL2	Homo sapiens angiomotin like 2 (AMOTL2), transcript variant 2, mRNA [NM_016201]	angiomotin like 2	51421	GO:0005515|GO:0016324|GO:0035329|GO:0031410|GO:0005923|GO:0055037|GO:0016055|GO:0042802|GO:0005829	chr3	134074742	134074801	-	FALSE	hs|3q22.2	ENST00000422605	NM_016201	NM_016201	THC2469043	Hs.426312
SW948	A_24_P10137	0.00823889	680.757	1528.45	0	1.1527	1.1527	2.2233	P	P	P	P	RGCC	Homo sapiens regulator of cell cycle (RGCC), mRNA [NM_014059]	regulator of cell cycle	28984	GO:0005515|GO:0008285|GO:2000573|GO:0010718|GO:0005634|GO:2000048|GO:0050715|GO:0050710|GO:0071158|GO:0003331|GO:0006956|GO:0005737|GO:0051091|GO:0045944|GO:0001100|GO:0005813|GO:0072537|GO:0019901|GO:0071456|GO:0090272|GO:0045840|GO:0070412|GO:0030295|GO:0071850|GO:0010628|GO:0031659|GO:0032967|GO:0001937|GO:0016525|GO:0051496|GO:2000353|GO:0043537	chr13	42042937	42044635	+	FALSE	hs|13q14.11	ENST00000379359	NM_014059	NM_014059	NP209724	Hs.507866
SW948	A_22_P00001981	0.022878	40.2209	90.2355	0	1.14758	1.14758	2.21542	P	P	P	P						chr2	60579861	60579920	-	FALSE	hs|2p16.1	ENST00000457668			THC2603828
SW948	A_21_P0011948	0.0133472	8.65034	18.9623	0	1.12076	1.12076	2.17462	P	P	P	P		MIR4435-1 host gene (non-protein coding) [Source:HGNC Symbol;Acc:HGNC:35163] [ENST00000605570]				chr2	111965933	111965992	-	FALSE	hs|2q13	ENST00000605570	XR_425456	XR_425456	THC2607024	Hs.562920
SW948	A_32_P199551	0.0192583	54.9439	120.396	0	1.12074	1.12074	2.17458	P	P	P	P	SPTSSB	Homo sapiens serine palmitoyltransferase, small subunit B (SPTSSB), mRNA [NM_001040100]	serine palmitoyltransferase, small subunit B	165679	GO:0005515|GO:0004758|GO:0030148|GO:0005789|GO:0016021|GO:0017059	chr3	161063635	161063694	-	FALSE	hs|3q26.1	ENST00000497137	NM_001040100	NM_001040100	THC2472893	Hs.369104
SW948	A_22_P00013618	0.000672098	32.7587	72.3046	0	1.1158	1.1158	2.16715	P	P	P	P	lnc-RP11-582J16.5.1-3	LNCipedia lincRNA (lnc-RP11-582J16.5.1-3), lincRNA [lnc-RP11-582J16.5.1-3:1]	lnc-RP11-582J16.5.1-3:1			chr8	22423876	22423935	-	FALSE	hs|8p21.3
SW948	A_23_P398854	0.0380327	526.313	1158.49	0	1.1137	1.1137	2.164	P	P	P	P	DOK7	Homo sapiens docking protein 7 (DOK7), transcript variant 1, mRNA [NM_173660]	docking protein 7	285489	GO:0031594|GO:0030054|GO:0019901|GO:0005886|GO:0007528|GO:0061098|GO:0005158|GO:0043113|GO:0035091	chr4	3496146	3496205	+	FALSE	hs|4p16.3	ENST00000515886	NM_173660	NM_173660	THC2474438	Hs.122110
SW948	A_23_P29769	0.00942469	22.1128	48.4189	0	1.10553	1.10553	2.15178	P	P	P	P	WWTR1	Homo sapiens WW domain containing transcription regulator 1 (WWTR1), transcript variant 1, mRNA [NM_015472]	WW domain containing transcription regulator 1	25937	GO:0005515|GO:0010467|GO:0008284|GO:0006367|GO:0016567|GO:0045599|GO:0017145|GO:0010718|GO:0005634|GO:0031146|GO:0035414|GO:0042803|GO:0032835|GO:0005829|GO:0005737|GO:0035264|GO:0045944|GO:0072307|GO:0060993|GO:0007179|GO:0090090|GO:0005667|GO:0006355|GO:0003714|GO:0048762|GO:0003713|GO:0000122|GO:0035329|GO:0060390|GO:0006351|GO:0001649|GO:0060271|GO:0001933|GO:0005654|GO:0006469	chr3	149238593	149238652	-	FALSE	hs|3q25.1	ENST00000494754	NM_015472	NM_015472	THC2621342	Hs.477921
SW948	A_24_P169843	0.0181768	3541.28	7521.75	0	1.0611	1.0611	2.08652	P	P	P	P		keratin 18 pseudogene 28 [Source:HGNC Symbol;Acc:HGNC:33397] [ENST00000453838]				chr1	182928209	182928250	-	FALSE	hs|1q25.3	ENST00000453838
SW948	A_33_P3404779	0.0217824	9.17505	19.5162	-1.19209e-07	1.06029	1.06029	2.08535	P	P	P	P	TCTEX1D4	Homo sapiens Tctex1 domain containing 4 (TCTEX1D4), mRNA [NM_001013632]	Tctex1 domain containing 4	343521	GO:0005515|GO:0005815|GO:0001669|GO:0005930|GO:0036126|GO:0005634	chr1	45271596	45271655	-	FALSE	hs|1p34.1	ENST00000339355	NM_001013632	NM_001013632	THC2484168	Hs.585137
SW948	A_23_P259442	0.0171957	91.4987	194.008	0	1.05709	1.05709	2.08073	P	P	P	P	CPE	Homo sapiens carboxypeptidase E (CPE), mRNA [NM_001873]	carboxypeptidase E	1363	GO:0005794|GO:0005886|GO:0005634|GO:0072657|GO:0003214|GO:0042043|GO:0007218|GO:0008152|GO:0004180|GO:0006508|GO:0008270|GO:0030070|GO:0050839|GO:0044267|GO:0006464|GO:0070062|GO:0030667|GO:0004181|GO:0030658	chr4	166419232	166419291	+	FALSE	hs|4q32.3	ENST00000402744	NM_001873	NM_001873	THC2465477	Hs.75360
SW948	A_33_P3386723	0.0205508	3426.47	7256.3	0	1.05564	1.05564	2.07864	P	P	P	P		keratin 18 pseudogene 64 [Source:HGNC Symbol;Acc:HGNC:48891] [ENST00000434946]				chr6	85998178	85998237	+	FALSE	hs|6q14.3	ENST00000434946
SW948	A_33_P3407324	0.045438	104.848	220.952	0	1.05485	1.05485	2.07751	P	P	P	P	GULP1	Homo sapiens GULP, engulfment adaptor PTB domain containing 1 (GULP1), transcript variant 2, mRNA [NM_001252668]	GULP, engulfment adaptor PTB domain containing 1	51454	GO:0007165|GO:0005737|GO:0006869|GO:0006915|GO:0004871|GO:0006911	chr2	189458677	189458736	+	FALSE	hs|2q32.2	ENST00000409609	NM_001252668	NM_001252668	THC2507452	Hs.470887
SW948	A_33_P3390057	0.0210106	5729.32	12021.5	0	1.04774	1.04774	2.06729	P	P	P	P	TM4SF1	Homo sapiens transmembrane 4 L six family member 1 (TM4SF1), mRNA [NM_014220]	transmembrane 4 L six family member 1	4071	GO:0008150|GO:0003674|GO:0005887	chr3	149086810	149086869	-	FALSE	hs|3q25.1	ENST00000622124	NM_014220	NM_014220	THC2553695	Hs.351316
SW948	A_24_P100551	0.0491034	339.359	718.714	0	1.04612	1.04612	2.06497	P	P	P	P	SH3RF1	Homo sapiens SH3 domain containing ring finger 1 (SH3RF1), mRNA [NM_020870]	SH3 domain containing ring finger 1	57630	GO:0046328|GO:0005515|GO:2001237|GO:0048471|GO:0043066|GO:0016567|GO:0005794|GO:0016874|GO:0008270|GO:0043154|GO:0030027|GO:0005829	chr4	170015505	170015564	-	FALSE	hs|4q32.3	ENST00000284637	NM_020870	NM_020870	THC2462298	Hs.301804
SW948	A_33_P3240295	0.0185259	2576.19	5405.63	0	1.04422	1.04422	2.06225	P	P	P	P		keratin 18 pseudogene 26 [Source:HGNC Symbol;Acc:HGNC:33395] [ENST00000454475]				chr2	74534360	74534419	-	FALSE	hs|2p13.1	ENST00000454475
SW948	A_21_P0009080	0.0270331	8.51276	17.8224	1.19209e-07	1.03177	1.03177	2.04453	P	P	P	P	lnc-COX4NB-1	LNCipedia lincRNA (lnc-COX4NB-1), lincRNA [lnc-COX4NB-1:1]	lnc-COX4NB-1:1			chr16	85995141	85995498	-	FALSE	hs|16q24.1
SW948	A_23_P92161	0.0450093	134.865	276.382	0	1.01783	1.01783	2.02487	P	P	P	P	ARL14	Homo sapiens ADP-ribosylation factor-like 14 (ARL14), mRNA [NM_025047]	ADP-ribosylation factor-like 14	80117	GO:0005515|GO:0007264|GO:0016023|GO:0005525	chr3	160395648	160395707	+	FALSE	hs|3q25.33	ENST00000320767	NM_025047	NM_025047	THC2477699	Hs.287702
SW948	A_24_P401601	0.0277714	1199.34	2469.81	0	1.01313	1.01313	2.01828	P	P	P	P		keratin 18 pseudogene 40 [Source:HGNC Symbol;Acc:HGNC:33409] [ENST00000599859]				chr19	21145404	21145465	+	FALSE	hs|19p12	ENST00000599859
SW948	A_24_P358131	0.0108839	2162.46	4429.86	0	1.00935	1.00935	2.013	P	P	P	P		keratin 18 pseudogene 52 [Source:HGNC Symbol;Acc:HGNC:37888] [ENST00000404956]				chr2	32047660	32047698	-	FALSE	hs|2p23.1	ENST00000404956
SW948	A_23_P418274	0.0263299	22.1982	45.9515	0	1.00893	1.00893	2.01241	P	P	P	P	WBSCR28	Homo sapiens Williams-Beuren syndrome chromosome region 28 (WBSCR28), mRNA [NM_182504]	Williams-Beuren syndrome chromosome region 28	135886	GO:0016021	chr7	73279736	73279950	+	FALSE	hs|7q11.23	ENST00000426490	NM_182504	NM_182504	THC2488320	Hs.647026
SW948	A_23_P101054	0.0443646	2.22784	69.4952	2.38419e-07	4.98421	4.98421	31.6516	A	A	P	P	KRT34	Homo sapiens keratin 34, type I (KRT34), mRNA [NM_021013]	keratin 34, type I	3885	GO:0005882|GO:0008544|GO:0005198|GO:0005615|GO:0070062	chr17	39534018	39534077	-	FALSE	hs|17q21.2	ENST00000394001	NM_021013	NM_021013	THC2473628	Hs.296942
SW948	A_21_P0009686	0.0113674	1.36001	25.6235	0	4.21955	4.21955	18.63	A	A	P	P	lnc-OR10H5-2	LNCipedia lincRNA (lnc-OR10H5-2), lincRNA [lnc-OR10H5-2:3]	lnc-OR10H5-2:3			chr19	15939826	15940011	+	FALSE	hs|19p13.12
SW948	A_22_P00002200	0.0110292	1.5607	29.0608	0	4.21495	4.21495	18.5706	A	A	P	P	LOC101928666	PREDICTED: Homo sapiens uncharacterized LOC101928666 (LOC101928666), ncRNA [XR_246468]	uncharacterized LOC101928666	101928666		chr11	111384861	111384920	-	FALSE	hs|11q23.1		XR_246468	XR_246468	NP1139107	Hs.617168
SW948	A_33_P3238166	0.0283901	3.5783	56.2362	2.38419e-07	3.9238	3.9238	15.1768	A	A	P	P	PXDN	Homo sapiens peroxidasin (PXDN), mRNA [NM_012293]	peroxidasin	7837	GO:0005783|GO:0005578|GO:0005152|GO:0005615|GO:0046872|GO:0031012|GO:0006955|GO:0004601|GO:0001960|GO:0030198|GO:0042744|GO:0006979|GO:0070062|GO:0055114|GO:0005201|GO:0020037	chr2	1635659	1635717	-	FALSE	hs|2p25.3	ENST00000252804	NM_012293	NM_012293	THC2534390	Hs.332197
SW948	A_23_P26994	0.00301126	1.13247	16.2188	0	3.79725	3.79725	13.9023	A	A	P	P	GNGT2	Homo sapiens guanine nucleotide binding protein (G protein), gamma transducing activity polypeptide 2 (GNGT2), transcript variant 1, mRNA [NM_031498]	guanine nucleotide binding protein (G protein), gamma transducing activity polypeptide 2	2793	GO:0007186|GO:0005886|GO:0008152|GO:0005834|GO:0003924|GO:0007268|GO:0004871|GO:0007602	chr17	47283975	47284034	-	FALSE	hs|17q21.32	ENST00000515635	NM_031498	NM_031498	THC2475522	Hs.181781
SW948	A_21_P0011018	0.00450701	3.16788	29.8998	0	3.19307	3.19307	9.14553	A	A	P	P	LOC101928620	PREDICTED: Homo sapiens uncharacterized LOC101928620 (LOC101928620), transcript variant X1, ncRNA [XR_246466]	uncharacterized LOC101928620	101928620		chr11	111267532	111267591	-	FALSE	hs|11q23.1		XR_246466	XR_246466	THC2702105
SW948	A_32_P189781	0.00263234	1.33447	10.7649	0	2.99771	2.99771	7.98734	A	A	P	P	LINC00520	Homo sapiens long intergenic non-protein coding RNA 520 (LINC00520), transcript variant 1, long non-coding RNA [NR_026796]	long intergenic non-protein coding RNA 520	645687		chr14	56247878	56247937	-	FALSE	hs|14q22.3	ENST00000560267	NR_026796	NR_026796	THC2718625	Hs.569345
SW948	A_33_P3221989	0.046277	3.25541	26.6822	0	2.98103	2.98103	7.8955	A	A	P	P	CACNB4	Homo sapiens calcium channel, voltage-dependent, beta 4 subunit (CACNB4), transcript variant 1, mRNA [NM_001005747]	calcium channel, voltage-dependent, beta 4 subunit	785	GO:0005515|GO:0050852|GO:0051899|GO:0005886|GO:0014051|GO:0007268|GO:0045202|GO:0048538|GO:0048536|GO:0019227|GO:0005829|GO:0048747|GO:0048541|GO:0050908|GO:0007528|GO:0007411|GO:0007628|GO:0006810|GO:0005245|GO:0019901|GO:0046058|GO:0006874|GO:0035249|GO:0008331|GO:0007214|GO:0005891|GO:0070588|GO:0009898	chr2	152694180	152694239	-	FALSE	hs|2q23.3	ENST00000539935	NM_001005747	NM_001005747	THC2478100	Hs.120725
SW948	A_21_P0014514	0.00713833	2.7026	16.9641	0	2.6235	2.6235	6.16245	A	A	P	P		HNC45-1-G12.R HNC (Human Normal Cartilage) Homo sapiens cDNA, mRNA sequence [BG927974]				chr6	132269645	132269704	+	FALSE	hs|6q23.2		BG927974			Hs.720521
SW948	A_22_P00010404	0.0120457	1.43913	7.32861	0	2.35097	2.35097	5.10167	A	A	P	P	lnc-MYO1D-1	Homo sapiens cDNA clone IMAGE:5273098. [BC037534]	lnc-MYO1D-1:1			chr17	30770867	30770926	-	FALSE	hs|17q11.2		BC037534
SW948	A_22_P00009680	0.0425131	1.76455	8.72928	0	2.28516	2.28516	4.87418	A	A	P	P	LINC01468	Homo sapiens long intergenic non-protein coding RNA 1468 (LINC01468), transcript variant 1, long non-coding RNA [NR_120641]	long intergenic non-protein coding RNA 1468	101928687		chr10	54211074	54211133	-	FALSE	hs|10q21.1	ENST00000422763	NR_120641	NR_120641	THC2772643	Hs.380362
SW948	A_21_P0007476	0.0412176	1.99307	9.77458	-2.38419e-07	2.21364	2.21364	4.63845	A	A	P	P	LINC00592	Homo sapiens long intergenic non-protein coding RNA 592 (LINC00592), long non-coding RNA [NR_027358]	long intergenic non-protein coding RNA 592	283404		chr12	52617464	52617523	+	FALSE	hs|12q13.13	ENST00000549830	NR_027358	NR_027358	THC2639993	Hs.662443
SW948	A_21_P0008216	0.0489772	1.51252	6.05953	-2.38419e-07	2.02618	2.02618	4.07325	A	A	P	P	lnc-ANKRD10-1	Q5T8L1_HUMAN (Q5T8L1) OTTHUMP00000018722, partial (8%) [THC2577843]	lnc-ANKRD10-1:1			chr13	111609536	111609595	-	FALSE	hs|13q34				THC2577843
SW948	A_23_P142606	0.0250123	1.72601	6.19997	0	1.84813	1.84813	3.60034	A	A	P	P	CRYGC	Homo sapiens crystallin, gamma C (CRYGC), mRNA [NM_020989]	crystallin, gamma C	1420	GO:0005515|GO:0005737|GO:0005212|GO:0043010|GO:0005634|GO:0007601	chr2	208992908	208992967	-	FALSE	hs|2q33.3	ENST00000282141	NM_020989	NM_020989	THC2475198	Hs.72910
SW948	A_21_P0011952	0.00260796	2.06635	6.75428	0	1.69014	1.69014	3.22688	A	A	P	P	LOC101927260	PREDICTED: Homo sapiens uncharacterized LOC101927260 (LOC101927260), ncRNA [XR_244828]	uncharacterized LOC101927260	101927260		chr2	112004637	112004696	-	FALSE	hs|2q13		XR_244828	XR_244828	THC2677895
SW948	A_21_P0000065	0.00579388	4.89081	15.8026	0	1.66981	1.66981	3.18173	A	A	P	P	SLC1A3	Homo sapiens solute carrier family 1 (glial high affinity glutamate transporter), member 3 (SLC1A3), transcript variant 3, mRNA [NM_001166696]	solute carrier family 1 (glial high affinity glutamate transporter), member 3	6507	GO:0005886|GO:0007605|GO:0005314|GO:0070779|GO:0005313|GO:0007268|GO:0042995|GO:0031223|GO:0048667|GO:0050885|GO:0043025|GO:0009416|GO:0043205|GO:0017153|GO:0046677|GO:0006811|GO:0009986|GO:0006537|GO:0051938|GO:0021545|GO:0042493|GO:0009611|GO:0055085|GO:0016020|GO:0050806|GO:0001504|GO:0016021|GO:0016595|GO:0009449	chr5	36609249	36609308	+	FALSE	hs|5p13.2	ENST00000512374	NM_001166696	NM_001166696	THC2481667	Hs.481918
SW948	A_23_P111978	0.0423683	3.60809	9.39655	-2.38419e-07	1.37066	1.37067	2.5859	A	A	P	P	KCNK9	Homo sapiens potassium channel, two pore domain subfamily K, member 9 (KCNK9), transcript variant 1, mRNA [NM_001282534]	potassium channel, two pore domain subfamily K, member 9	51305	GO:0005244|GO:0046982|GO:0005886|GO:0090102|GO:0007268|GO:0005267|GO:0034765|GO:0016021|GO:0006813|GO:0071805|GO:0042803|GO:0008021	chr8	140631120	140631179	-	FALSE	hs|8q24.3	ENST00000303015	NM_001282534	NM_001282534	THC2604653	Hs.493037
SW948	A_22_P00023857	0.0199937	3.56173	8.94844	0	1.28658	1.28658	2.4395	A	A	P	P	lnc-YPEL5-3	LNCipedia lincRNA (lnc-YPEL5-3), lincRNA [lnc-YPEL5-3:1]	lnc-YPEL5-3:1			chr2	30115161	30115220	+	FALSE	hs|2p23.1
SW948	A_22_P00022128	0.000382755	5.07193	12.3815	2.38419e-07	1.26104	1.26104	2.39669	A	A	P	P	TM4SF1-AS1	Homo sapiens TM4SF1 antisense RNA 1 (TM4SF1-AS1), transcript variant 1, long non-coding RNA [NR_109809]	TM4SF1 antisense RNA 1	100874091		chr3	149104273	149104332	+	FALSE	hs|3q25.1		NR_109809	NR_109809	THC2672207	Hs.549633
SW948	A_33_P3254579	0.0161176	3.84734	9.37545	0	1.25848	1.25848	2.39243	A	A	P	P	KRTAP1-5	Homo sapiens keratin associated protein 1-5 (KRTAP1-5), mRNA [NM_031957]	keratin associated protein 1-5	83895	GO:0008150|GO:0003674|GO:0005575|GO:0045095	chr17	39183227	39183286	-	FALSE	hs|17q21.2	ENST00000361883	NM_031957	NM_031957	THC2479290	Hs.534499
SW948	A_21_P0009332	0.0363923	3.7832	9.10282	2.38419e-07	1.2433	1.2433	2.3674	A	A	P	P	lnc-COL1A1-4	LNCipedia lincRNA (lnc-COL1A1-4), lincRNA [lnc-COL1A1-4:1]	lnc-COL1A1-4:1			chr17	48364208	48365112	-	FALSE	hs|17q21.33
SW948	A_23_P13294	0.0130176	3.39606	7.89172	0	1.19337	1.19337	2.28686	A	A	P	P	OR1S2	Homo sapiens olfactory receptor, family 1, subfamily S, member 2 (OR1S2), mRNA [NM_001004459]	olfactory receptor, family 1, subfamily S, member 2	219958	GO:0050911|GO:0050907|GO:0004984|GO:0007186|GO:0005886|GO:0004930|GO:0016021|GO:0004888	chr11	57971510	57971569	-	FALSE	hs|11q12.1	ENST00000302592	NM_001004459	NM_001004459	THC2603194	Hs.553644
SW948	A_21_P0006728	0.0253702	4.53484	10.3235	0	1.15659	1.15659	2.22929	A	A	P	P	LINC00704	long intergenic non-protein coding RNA 704 [Source:HGNC Symbol;Acc:HGNC:44678] [ENST00000449712]	long intergenic non-protein coding RNA 704	100216001		chr10	4693388	4698946	-	FALSE	hs|10p15.1	ENST00000449712
SW948	A_33_P3352019	0.0147735	5.6274	12.846	0	1.15528	1.15528	2.22728	A	A	P	P	SCARA3	Homo sapiens scavenger receptor class A, member 3 (SCARA3), transcript variant 2, mRNA [NM_182826]	scavenger receptor class A, member 3	51435	GO:0009650|GO:0005581|GO:0000139|GO:0005789|GO:0016021|GO:0006979|GO:0006898|GO:0005044	chr8	27516996	27517055	+	FALSE	hs|8p21.1	ENST00000337221	NM_182826	NM_182826	THC2476870	Hs.128856
SW948	A_21_P0009969	0.0368378	5.3391	12.1085	-2.38419e-07	1.14982	1.14982	2.21886	A	A	P	P	lnc-ARFGEF2-2	LNCipedia lincRNA (lnc-ARFGEF2-2), lincRNA [lnc-ARFGEF2-2:7]	lnc-ARFGEF2-2:7			chr20	47133327	47133386	+	FALSE	hs|20q13.13				THC2519534	Hs.640099
SW948	A_24_P357266	0.023548	4.01256	9.00864	2.38419e-07	1.14441	1.14441	2.21055	A	A	P	P	GRPR	Homo sapiens gastrin-releasing peptide receptor (GRPR), mRNA [NM_005314]	gastrin-releasing peptide receptor	2925	GO:0004946|GO:0031989|GO:0007186|GO:0005886|GO:0008283|GO:0005887|GO:0042127|GO:0008528	chrX	16171051	16171110	+	FALSE	hs|Xp22.2	ENST00000380289	NM_005314	NM_005314	THC2478137	Hs.567282
SW948	A_22_P00015088	0.0442331	3.10563	6.869	0	1.12262	1.12262	2.17742	A	A	P	P	lnc-SNURF-3	Homo sapiens clone Rt-5 SNURF-SNRPN mRNA, downstream untranslated exons, alternatively spliced. [AF400489]	lnc-SNURF-3:9			chr15	25415683	25415742	+	FALSE	hs|15q11.2		AF400489		NP1166275	Hs.555970
SW948	A_23_P87310	0.0237731	3.32699	7.27075	0	1.12103	1.12103	2.17502	A	A	P	P	LMO1	Homo sapiens LIM domain only 1 (rhombotin 1) (LMO1), transcript variant 1, mRNA [NM_002315]	LIM domain only 1 (rhombotin 1)	4004	GO:0045944|GO:0008270|GO:0005634|GO:0000122	chr11	8245921	8245980	-	FALSE	hs|11p15.4	ENST00000335790	NM_002315	NM_002315	THC2613726	Hs.654426
SW948	A_21_P0005333	0.0474914	5.68674	12.151	0	1.0827	1.0827	2.118	A	A	P	P	lnc-PAX4-1	LNCipedia lincRNA (lnc-PAX4-1), lincRNA [lnc-PAX4-1:1]	lnc-PAX4-1:1			chr7	127284739	127285126	-	FALSE	hs|7q32.1					Hs.590482
SW948	A_23_P11841	0.0479444	6.4404	13.8905	-1.19209e-07	1.06044	1.06044	2.08557	A	A	P	P	ATP2B4	Homo sapiens ATPase, Ca++ transporting, plasma membrane 4 (ATP2B4), transcript variant 2, mRNA [NM_001684]	ATPase, Ca++ transporting, plasma membrane 4	493	GO:0005515|GO:0050998|GO:1900082|GO:0005516|GO:0030346|GO:0030018|GO:0005886|GO:0046872|GO:0055074|GO:0033138|GO:0034220|GO:0045019|GO:0097110|GO:2000481|GO:0006357|GO:0006874|GO:0030315|GO:0070885|GO:0055085|GO:0005524|GO:0010751|GO:0005388|GO:0043234|GO:0071872|GO:0016020|GO:0051001|GO:0007596|GO:0005887|GO:0005901|GO:0051599|GO:0008152|GO:0070588|GO:0017080	chr1	203690464	203690523	+	FALSE	hs|1q32.1	ENST00000341360	NM_001684	NM_001684	THC2463999	Hs.343522
SW948	A_21_P0012329	0.0287874	3.60468	7.5936	0	1.03617	1.03617	2.05078	A	A	P	P	XLOC_l2_009441	BROAD Institute lincRNA (XLOC_l2_009441), lincRNA [TCONS_l2_00018296]				chr22	16193058	16193117	-	FALSE	hs|22q11.1				THC2522425
SW948	A_33_P3232742	0.023555	3.39558	6.90287	0	1.01475	1.01475	2.02056	A	A	P	P						chr6	36650782	36650841	+	FALSE	hs|6p21.2
SW948	A_23_P69493	0.0283357	5321.85	265.872	0	-4.34723	-4.34723	0.0491307	P	P	P	P	RHOA	Homo sapiens ras homolog family member A (RHOA), mRNA [NM_001664]	ras homolog family member A	387	GO:0044319|GO:0005515|GO:0042346|GO:0033688|GO:0043931|GO:0030036|GO:0030054|GO:0005886|GO:0007264|GO:0003924|GO:0007266|GO:0032154|GO:0036089|GO:0005829|GO:0043297|GO:0043296|GO:0007411|GO:0016032|GO:0007179|GO:0090307|GO:0043123|GO:0005856|GO:0005938|GO:0070062|GO:0030334|GO:0051056|GO:0048010|GO:0048011|GO:0048013|GO:0032467|GO:0048015|GO:0050919|GO:0030168|GO:0030496|GO:0061383|GO:0005525|GO:…	chr3	49397212	49397271	-	FALSE	hs|3p21.31	ENST00000418115	NM_001664	NM_001664	THC2551232	Hs.247077
SW948	A_21_P0007825	0.00698166	143.409	20.3601	0	-2.85462	-2.85462	0.138253	P	P	P	P	lnc-DERA-1	LNCipedia lincRNA (lnc-DERA-1), lincRNA [lnc-DERA-1:1]	lnc-DERA-1:1			chr12	16573924	16573983	+	FALSE	hs|12p12.3
SW948	A_23_P253542	0.0073981	408.44	99.7589	0	-2.05936	-2.05936	0.239922	P	P	P	P	SMPX	Homo sapiens small muscle protein, X-linked (SMPX), transcript variant 1, mRNA [NM_014332]	small muscle protein, X-linked	23676	GO:0043034|GO:0006941|GO:0005634|GO:0031430|GO:0005927	chrX	21724230	21724289	-	FALSE	hs|Xp22.12	ENST00000379494	NM_014332	NM_014332	THC2472864	Hs.86492
SW948	A_23_P24083	0.0161546	60.9818	16.261	0	-1.93138	-1.93138	0.262179	P	P	P	P	PNLIPRP2	Homo sapiens pancreatic lipase-related protein 2 (PNLIPRP2), transcript variant 1, mRNA [NM_005396]	pancreatic lipase-related protein 2	5408	GO:0004806|GO:0044241|GO:0005509|GO:0047372|GO:0006641|GO:0005576|GO:0044281|GO:0019376|GO:0004620|GO:0047714|GO:0009395|GO:0005615	chr10	118404557	118404616	+	FALSE	hs|10q25.3	ENST00000579578	NM_005396	NM_005396	THC2660134	Hs.423598
SW948	A_33_P3355538	0.0432352	23.8004	7.5944	0	-1.67887	-1.67887	0.312327	P	P	P	P	CERKL	Homo sapiens ceramide kinase-like (CERKL), transcript variant 2, mRNA [NM_001030311]	ceramide kinase-like	375298	GO:0016310|GO:0043066|GO:0005737|GO:0005794|GO:0003951|GO:0005783|GO:0005730|GO:0004143|GO:0007205	chr2	182402911	182402970	-	FALSE	hs|2q31.3	ENST00000494398	NM_001030311	NM_001030311	NP1462402	Hs.732358
SW948	A_33_P3370855	0.0400811	24.3412	8.77539	0	-1.49888	-1.49888	0.353827	P	P	P	P		GB				chrX	107627153	107627212	+	FALSE	hs|Xq22.3	ENST00000453808			NP1083400
SW948	A_21_P0011939	0.00608991	281.506	119.923	0	-1.25562	-1.25562	0.418813	P	P	P	P						chr2	97950690	97950749	+	FALSE	hs|2q11.2	ENST00000431244
SW948	A_23_P7562	0.00879172	24.2153	10.8075	0	-1.18729	-1.18729	0.439127	P	P	P	P	ACSL6	Homo sapiens acyl-CoA synthetase long-chain family member 6 (ACSL6), transcript variant 2, mRNA [NM_001009185]	acyl-CoA synthetase long-chain family member 6	23305	GO:0001676|GO:0005886|GO:0005741|GO:0005634|GO:0044281|GO:0035338|GO:0042803|GO:0007405|GO:0048666|GO:0019432|GO:0044255|GO:0005778|GO:0006637|GO:0001666|GO:0032869|GO:0010867|GO:0007584|GO:0010747|GO:0008654|GO:0048545|GO:0005524|GO:0004467|GO:0009629|GO:0016020|GO:0010976|GO:0005789|GO:0015908|GO:0016021|GO:0019899	chr5	131289903	131289962	-	FALSE	hs|5q31.1	ENST00000493861	NM_001009185	NM_001009185	NP1192912	Hs.14945
SW948	A_23_P258194	0.0325333	118.036	54.7321	0	-1.13665	-1.13665	0.454814	P	P	P	P	AIFM3	Homo sapiens apoptosis-inducing factor, mitochondrion-associated, 3 (AIFM3), transcript variant 2, mRNA [NM_001018060]	apoptosis-inducing factor, mitochondrion-associated, 3	150209	GO:0005739|GO:0051537|GO:0005783|GO:0050660|GO:0016491|GO:0005743|GO:0097194|GO:0045454|GO:0005634|GO:0046872|GO:0055114	chr22	21333957	21334333	+	FALSE	hs|22q11.21	ENST00000465606	NM_001018060	NM_001018060	THC2696730	Hs.723246
SW948	A_33_P3489228	0.032402	18.0137	8.41653	0	-1.11867	-1.11867	0.460519	P	P	P	P	PTPN20B	Homo sapiens protein tyrosine phosphatase, non-receptor type 20B (PTPN20B), transcript variant 2, mRNA [NM_015605]	protein tyrosine phosphatase, non-receptor type 20B	26095	GO:0005737|GO:0005815|GO:0005874|GO:0005634|GO:0035335|GO:0004725	chr10	48774226	48774285	-	FALSE	hs|10q11.22	ENST00000417004	NM_015605	NM_015605	NP1456486	Hs.499552
SW948	A_33_P3322879	0.0195156	76.6472	37.0198	0	-1.06988	-1.06988	0.47636	P	P	P	P	LOC102724484	Homo sapiens uncharacterized LOC102724484 (LOC102724484), long non-coding RNA [NR_120522]	uncharacterized LOC102724484	102724484		chr7	29238671	29238730	-	FALSE	hs|7p14.3		NR_120522	NR_120522		Hs.638665
SW948	A_33_P3392882	0.0426464	28.573	13.8382	0	-1.06749	-1.06749	0.477148	P	P	P	P	NCKAP5	Homo sapiens NCK-associated protein 5 (NCKAP5), transcript variant 2, mRNA [NM_207481]	NCK-associated protein 5	344148	GO:0008150|GO:0005575	chr2	133721297	133721356	-	FALSE	hs|2q21.2	ENST00000409213	NM_207481	NM_207481	THC2607765	Hs.537329
SW948	A_23_P256473	0.0384099	178.617	87.0647	0	-1.05999	-1.05999	0.479635	P	P	P	P	SEMA3C	Homo sapiens sema domain, immunoglobulin domain (Ig), short basic domain, secreted, (semaphorin) 3C (SEMA3C), mRNA [NM_006379]	sema domain, immunoglobulin domain (Ig), short basic domain, secreted, (semaphorin) 3C	10512	GO:0042493|GO:0001756|GO:0001755|GO:0003350|GO:0003215|GO:0009791|GO:0005615|GO:0003151|GO:0006955|GO:0016020|GO:0001974|GO:0007411|GO:0060666|GO:0021915|GO:0060174|GO:0030215|GO:0004872|GO:0070062	chr7	80372412	80372471	-	FALSE	hs|7q21.11	ENST00000265361	NM_006379	NM_006379	THC2468635	Hs.269109
SW948	A_23_P64792	0.0143021	2262.48	1096.87	0	-1.05661	-1.05661	0.480762	P	P	P	P	KCNMB4	Homo sapiens potassium channel subfamily M regulatory beta subunit 4 (KCNMB4), mRNA [NM_014505]	potassium channel subfamily M regulatory beta subunit 4	27345	GO:0005515|GO:0005513|GO:0005886|GO:0046928|GO:0007268|GO:0015459|GO:0019228|GO:0019229|GO:0005887|GO:0007596|GO:0008076|GO:0001508|GO:0006813|GO:0015269|GO:0071805	chr12	70824623	70824682	+	FALSE	hs|12q15	ENST00000258111	NM_014505	NM_014505	THC2470841	Hs.525529
SW948	A_33_P3390656	0.00655616	19.2523	9.56418	0	-1.0342	-1.0342	0.488287	P	P	P	P	ACSL6	Homo sapiens acyl-CoA synthetase long-chain family member 6 (ACSL6), transcript variant 2, mRNA [NM_001009185]	acyl-CoA synthetase long-chain family member 6	23305	GO:0001676|GO:0005886|GO:0005741|GO:0005634|GO:0044281|GO:0035338|GO:0042803|GO:0007405|GO:0048666|GO:0019432|GO:0044255|GO:0005778|GO:0006637|GO:0001666|GO:0032869|GO:0010867|GO:0007584|GO:0010747|GO:0008654|GO:0048545|GO:0005524|GO:0004467|GO:0009629|GO:0016020|GO:0010976|GO:0005789|GO:0015908|GO:0016021|GO:0019899	chr5	131302164	131302223	-	FALSE	hs|5q31.1	ENST00000543479	NM_001009185	NM_001009185	NP1192912	Hs.14945
SW948	A_32_P212471	0.02316	24.6104	12.3606	0	-1.00757	-1.00757	0.497384	P	P	P	P	RIIAD1	Homo sapiens regulatory subunit of type II PKA R-subunit (RIIa) domain containing 1 (RIIAD1), mRNA [NM_001144956]	regulatory subunit of type II PKA R-subunit (RIIa) domain containing 1	284485		chr1	151701998	151702057	+	FALSE	hs|1q21.3	ENST00000479191	NM_001144956	NM_001144956	THC2480827	Hs.297967
SW948	A_24_P766716	0.0165798	10.892	1.16693	0	-3.24343	-3.24343	0.105592	P	P	A	A	CMKLR1	Homo sapiens chemokine-like receptor 1 (CMKLR1), transcript variant 1, mRNA [NM_001142343]	chemokine-like receptor 1	1240	GO:0050848|GO:0005515|GO:0070098|GO:0005886|GO:0004930|GO:0032088|GO:0001501|GO:0006955|GO:0006935|GO:0007186|GO:0032695|GO:0005887|GO:0045600|GO:0004950|GO:0010759|GO:0004872|GO:0016021	chr12	108681884	108681943	-	FALSE	hs|12q23.3	ENST00000312143	NM_001142343	NM_001142343	THC2699717	Hs.197143
SW948	A_23_P204304	0.0261974	6.66032	1.26944	-1.19209e-07	-2.42452	-2.42452	0.186271	P	P	A	A	PTPRO	Homo sapiens protein tyrosine phosphatase, receptor type, O (PTPRO), transcript variant 1, mRNA [NM_030667]	protein tyrosine phosphatase, receptor type, O	5800	GO:0005515|GO:0072112|GO:0043005|GO:0017147|GO:0030424|GO:0090260|GO:0036060|GO:0005886|GO:0030032|GO:0010812|GO:0042803|GO:0032835|GO:0035335|GO:0030426|GO:0016791|GO:0016324|GO:0006470|GO:0043197|GO:0007411|GO:0005001|GO:0090090|GO:0004725|GO:0070062|GO:0003105|GO:0016328|GO:0030027|GO:0002548|GO:0000902|GO:0005887|GO:0003093|GO:0010977|GO:0016021	chr12	15749688	15749747	+	FALSE	hs|12p12.3	ENST00000281171	NM_030667	NM_030667	THC2479375	Hs.160871
SW948	A_22_P00003179	0.0295415	8.47196	2.18332	0	-1.97563	-1.97563	0.254258	P	P	A	A	lnc-C9orf80-1	LNCipedia lincRNA (lnc-C9orf80-1), lincRNA [lnc-C9orf80-1:2]	lnc-C9orf80-1:2			chr9	115511459	115511518	-	FALSE	hs|9q32
SW948	A_33_P3212172	0.0381376	9.80059	2.69277	0	-1.89672	-1.89672	0.268554	P	P	A	A	SNX22	Homo sapiens sorting nexin 22 (SNX22), transcript variant 1, mRNA [NM_024798]	sorting nexin 22	79856	GO:0035091|GO:0015031|GO:0030659	chr15	64449621	64449680	+	FALSE	hs|15q22.31	ENST00000557789	NM_024798	NM_024798	THC2501786	Hs.744250
SW948	A_23_P40919	0.0145762	13.8809	3.87747	0	-1.87133	-1.87133	0.273322	P	P	A	A	GPR128	Homo sapiens G protein-coupled receptor 128 (GPR128), mRNA [NM_032787]	G protein-coupled receptor 128	84873	GO:0007186|GO:0005886|GO:0004930|GO:0016021	chr3	100387903	100413600	+	FALSE	hs|3q12.2	ENST00000481506	NM_032787	NM_032787	THC2619783	Hs.334511
SW948	A_21_P0014305	0.0216953	8.58284	2.6208	0	-1.73869	-1.73869	0.299642	P	P	A	A						chr15	101433934	101433993	-	FALSE	hs|15q26.3
SW948	A_21_P0012113	0.0308851	7.67788	2.63179	-1.19209e-07	-1.55836	-1.55836	0.339536	P	P	A	A		vomeronasal 1 receptor 108 pseudogene [Source:HGNC Symbol;Acc:HGNC:37432] [ENST00000431580]				chr20	25715095	25715154	+	FALSE	hs|20p11.1	ENST00000431580			THC2608780
SW948	ERCC-00017_150	0.0294781	6.46439	2.25185	0	-1.54895	-1.54895	0.34176	P	P	A	A										pos
SW948	A_22_P00013204	0.0460932	10.3306	3.65852	0	-1.519	-1.519	0.348927	P	P	A	A	lnc-RNF219-3	Homo sapiens cDNA FLJ11514 fis, clone HEMBA1002229. [AK021576]	lnc-RNF219-3:1			chr13	79890471	79890530	-	FALSE	hs|13q31.1		AK021576		THC2496752	Hs.736000
SW948	A_23_P303851	0.0237219	6.95058	2.51819	-1.19209e-07	-1.51031	-1.51031	0.351036	P	P	A	A	TAS2R45	Homo sapiens taste receptor, type 2, member 45 (TAS2R45), mRNA [NM_176886]	taste receptor, type 2, member 45	259291	GO:0033038|GO:0007186|GO:0005886|GO:0016021|GO:0001580					FALSE		ENST00000571573	NM_176886	NM_176886	THC2603661	Hs.287378
SW948	A_21_P0008750	0.0169609	7.58989	2.80156	0	-1.47142	-1.47142	0.360627	P	P	A	A	lnc-CILP-1	LNCipedia lincRNA (lnc-CILP-1), lincRNA [lnc-CILP-1:1]	lnc-CILP-1:1			chr15	65540542	65540601	-	FALSE	hs|15q22.31
SW948	A_33_P3243500	0.0444379	6.38988	2.9686	1.19209e-07	-1.15674	-1.15674	0.448525	P	P	A	A	LOC729732	Homo sapiens uncharacterized LOC729732 (LOC729732), long non-coding RNA [NR_047662]	uncharacterized LOC729732	729732		chr8	12517267	12517326	-	FALSE	hs|8p23.1	ENST00000544461	NR_047662	NR_047662	THC2478567	Hs.696467
SW948	A_33_P3254727	0.0472605	9.48222	4.54914	0	-1.10028	-1.10028	0.466427	P	P	A	A						chr2	42722451	42722510	+	FALSE	hs|2p21				THC2568408
SW948	A_21_P0012418	0.0124729	6.65276	3.22923	1.19209e-07	-1.07465	-1.07465	0.474788	P	P	A	A	XLOC_l2_010029	BROAD Institute lincRNA (XLOC_l2_010029), lincRNA [TCONS_l2_00019040]				chr3	185693734	185693793	+	FALSE	hs|3q27.2
SW948	A_24_P292929	0.0249445	11.2965	5.54673	-1.19209e-07	-1.04571	-1.04571	0.484405	P	P	A	A	CAMKK1	Homo sapiens calcium/calmodulin-dependent protein kinase kinase 1, alpha (CAMKK1), transcript variant 3, mRNA [NM_172207]	calcium/calmodulin-dependent protein kinase kinase 1, alpha	84254	GO:0005515|GO:0005516|GO:0007268|GO:0006468|GO:0005634|GO:0004683|GO:0005524|GO:0005829	chr17	3772886	3773130	-	FALSE	hs|17p13.2	ENST00000158166	NM_172207	NM_172207	THC2487695	Hs.8417
AGS	A_33_P3268234	0.0114773	7.41418	18.4064	-1.19209e-07	1.33049	1.33049	2.51487	P	P	P	P	KRT39	Homo sapiens keratin 39, type I (KRT39), mRNA [NM_213656]	keratin 39, type I	390792	GO:0005882|GO:0005198	chr17	39114681	39114740	-	FALSE	hs|17q21.2	ENST00000355612	NM_213656	NM_213656	THC2487370	Hs.28467
AGS	A_23_P397120	0.037783	1568.75	3439.76	-2.38419e-07	1.16209	1.16209	2.23782	P	P	P	P	SMIM24	Homo sapiens small integral membrane protein 24 (SMIM24), mRNA [NM_001136503]	small integral membrane protein 24	284422	GO:0008150|GO:0003674|GO:0016021|GO:0070062	chr19	3474823	3474882	-	FALSE	hs|19p13.3	ENST00000215531	NM_001136503	NM_001136503	THC2706272	Hs.130714
AGS	A_22_P00025928	0.0273467	6.47817	13.448	0	1.07331	1.07331	2.10425	P	P	P	P	lnc-RIC3-1	Homo sapiens cDNA FLJ44947 fis, clone BRAMY4001913. [AK126895]	lnc-RIC3-1:1			chr11	8057169	8057228	-	FALSE	hs|11p15.4		AK126895		THC2726382	Hs.627496
AGS	A_24_P71973	0.00493988	1.43069	10.5278	0	2.89799	2.89799	7.4539	A	A	P	P	KDR	Homo sapiens kinase insert domain receptor (a type III receptor tyrosine kinase) (KDR), mRNA [NM_002253]	kinase insert domain receptor	3791	GO:0005515|GO:0030054|GO:0035584|GO:2001214|GO:0008360|GO:0051879|GO:0046777|GO:0030198|GO:0043129|GO:0070374|GO:0045446|GO:0038084|GO:0038083|GO:0001945|GO:0038085|GO:0023014|GO:0005794|GO:0030335|GO:0048286|GO:0014068|GO:0018108|GO:0010595|GO:0005178|GO:0045165|GO:0005887|GO:0045121|GO:0009897|GO:0008284|GO:0035924|GO:0005886|GO:0005783|GO:0002042|GO:0005634|GO:0051894|GO:0055074|GO:0050927|GO:…	chr4	55945397	55945456	-	FALSE	hs|4q12	ENST00000263923	NM_002253	NM_002253	THC2462520	Hs.479756
AGS	A_23_P52914	0.0430432	2.11224	8.5335	0	2.05904	2.05904	4.16707	A	A	P	P	OR4C15	Homo sapiens olfactory receptor, family 4, subfamily C, member 15 (OR4C15), mRNA [NM_001001920]	olfactory receptor, family 4, subfamily C, member 15	81309	GO:0050911|GO:0050907|GO:0004984|GO:0007186|GO:0005886|GO:0004930|GO:0016021|GO:0004888	chr11	55322421	55322480	+	FALSE	hs|11q11	ENST00000314644	NM_001001920	NM_001001920	THC2603104	Hs.589003
AGS	A_21_P0009726	0.0475417	4.66168	13.3759	0	1.53535	1.53535	2.89859	A	A	P	P	lnc-DHX34-1	LNCipedia lincRNA (lnc-DHX34-1), lincRNA [lnc-DHX34-1:1]	lnc-DHX34-1:1			chr19	47929364	47929423	+	FALSE	hs|19q13.32
AGS	A_33_P3414944	0.0379184	2.85576	8.16971	0	1.52783	1.52783	2.88353	A	A	P	P	lnc-GABARAPL3-4	LNCipedia lincRNA (lnc-GABARAPL3-4), lincRNA [lnc-GABARAPL3-4:1]	lnc-GABARAPL3-4:1			chr15	91147457	91147516	-	FALSE	hs|15q26.1
AGS	A_23_P116523	0.00766097	2.49013	6.76634	-2.38419e-07	1.46227	1.46227	2.75542	A	A	P	P		Homo sapiens PRO1787 mRNA, complete cds. [AF116668]				chr11	33903239	33903298	+	FALSE	hs|11p13		AF116668		THC2489941	Hs.621368
AGS	A_22_P00017302	0.0384672	3.52271	8.53649	0	1.30305	1.30305	2.46751	A	A	P	P	LINC00113	Homo sapiens long intergenic non-protein coding RNA 113 (LINC00113), long non-coding RNA [NR_024357]	long intergenic non-protein coding RNA 113	54088		chr21	29118290	29118349	+	FALSE	hs|21q21.3	ENST00000442550	NR_024357	NR_024357	THC2656460	Hs.570434
AGS	A_23_P327777	0.0277726	3.19474	7.53603	-2.38419e-07	1.25976	1.25976	2.39456	A	A	P	P	GATS	Homo sapiens GATS, stromal antigen 3 opposite strand (GATS), transcript variant 1, mRNA [NM_178831]	GATS, stromal antigen 3 opposite strand	352954		chr7	99798819	99798878	-	FALSE	hs|7q22.1	ENST00000328453	NM_178831	NM_178831	NP922670	Hs.556063
AGS	A_22_P00005554	0.0454312	3.91418	9.17779	0	1.24141	1.24141	2.3643	A	A	P	P	LOC643339	Homo sapiens uncharacterized LOC643339 (LOC643339), long non-coding RNA [NR_040096]	uncharacterized LOC643339	643339		chr12	93397534	93397593	-	FALSE	hs|12q22		NR_040096	NR_040096	THC2761427	Hs.741299
AGS	A_33_P3289745	0.0447513	6.17555	13.988	0	1.19307	1.19307	2.28639	A	A	P	P	LOC399900	PREDICTED: Homo sapiens uncharacterized LOC399900 (LOC399900), misc_RNA [XR_247232]	uncharacterized LOC399900	399900		chr11	61736625	61736684	+	FALSE	hs|11q12.3		XR_247232	XR_247232		Hs.528437
AGS	A_33_P3292724	0.0472415	2.77878	5.85933	0	1.10995	1.10995	2.15839	A	A	P	P	SZT2	seizure threshold 2 homolog (mouse) [Source:HGNC Symbol;Acc:HGNC:29040] [ENST00000372450]	seizure threshold 2 homolog (mouse)	23334	GO:0003674|GO:0021540|GO:0043473|GO:0009791|GO:0007417|GO:0070062|GO:0005777	chr1	43872505	43872564	+	FALSE	hs|1p34.2	ENST00000372450	BC017576			Hs.643560
AGS	A_22_P00016351	0.0257009	3.55587	7.32007	-2.38419e-07	1.06959	1.06959	2.09884	A	A	P	P						chr5	72509988	72510047	+	FALSE	hs|5q13.2	ENST00000427584			THC2630986	Hs.639635
AGS	A_21_P0003072	0.00367604	4.50202	9.05818	0	1.03068	1.03068	2.04298	A	A	P	P	lnc-EIF2B5-2	LNCipedia lincRNA (lnc-EIF2B5-2), lincRNA [lnc-EIF2B5-2:5]	lnc-EIF2B5-2:5			chr3	184445341	184446670	+	FALSE	hs|3q27.1
AGS	A_23_P69493	0.0274755	3652.07	170.613	-2.38419e-07	-4.4204	-4.4204	0.0467011	P	P	P	P	RHOA	Homo sapiens ras homolog family member A (RHOA), mRNA [NM_001664]	ras homolog family member A	387	GO:0044319|GO:0005515|GO:0042346|GO:0033688|GO:0043931|GO:0030036|GO:0030054|GO:0005886|GO:0007264|GO:0003924|GO:0007266|GO:0032154|GO:0036089|GO:0005829|GO:0043297|GO:0043296|GO:0007411|GO:0016032|GO:0007179|GO:0090307|GO:0043123|GO:0005856|GO:0005938|GO:0070062|GO:0030334|GO:0051056|GO:0048010|GO:0048011|GO:0048013|GO:0032467|GO:0048015|GO:0050919|GO:0030168|GO:0030496|GO:0061383|GO:0005525|GO:…	chr3	49397212	49397271	-	FALSE	hs|3p21.31	ENST00000418115	NM_001664	NM_001664	THC2551232	Hs.247077
AGS	A_21_P0007825	0.00036789	89.2093	9.27083	0	-3.24769	-3.24769	0.105281	P	P	P	P	lnc-DERA-1	LNCipedia lincRNA (lnc-DERA-1), lincRNA [lnc-DERA-1:1]	lnc-DERA-1:1			chr12	16573924	16573983	+	FALSE	hs|12p12.3
AGS	A_33_P3240752	0.0287224	78.1196	33.2543	0	-1.21259	-1.21259	0.431492	P	P	P	P	CLDN18	Homo sapiens claudin 18 (CLDN18), transcript variant 1, mRNA [NM_016369]	claudin 18	51208	GO:0016338|GO:0070830|GO:0005886|GO:0005198|GO:0034329|GO:0016021|GO:0005923|GO:0045216|GO:0042802	chr3	137752337	137752396	+	FALSE	hs|3q22.3	ENST00000183605	NM_016369	NM_016369	THC2603818	Hs.655324
AGS	A_21_P0009524	0.0498777	9.26462	1.4003	0	-2.68121	-2.68121	0.15591	P	P	A	A						chr18	10371396	10372227	-	FALSE	hs|18p11.22	ENST00000582531			THC2767827
AGS	A_32_P489662	0.038848	6.37735	1.12834	0	-2.48396	-2.48396	0.178753	P	P	A	A	KRT28	Homo sapiens keratin 28, type I (KRT28), mRNA [NM_181535]	keratin 28, type I	162605	GO:0005882|GO:0008150|GO:0003674|GO:0005737|GO:0005198|GO:0070062	chr17	38954600	38955184	-	FALSE	hs|17q21.2	ENST00000306658	NM_181535	NM_181535	THC2471407	Hs.59736
AGS	A_22_P00006260	0.000308693	6.8339	1.78818	0	-1.91454	-1.91454	0.265257	P	P	A	A	LINC00909	long intergenic non-protein coding RNA 909 [Source:HGNC Symbol;Acc:HGNC:44331] [ENST00000581192]	long intergenic non-protein coding RNA 909	400657		chr18	72265659	72265718	-	FALSE	hs|18q22.3	ENST00000581192			THC2687567
AGS	A_23_P93169	0.0425291	5.88894	1.81419	0	-1.67947	-1.67947	0.312196	P	P	A	A	LGSN	Homo sapiens lengsin, lens protein with glutamine synthetase domain (LGSN), transcript variant 1, mRNA [NM_016571]	lengsin, lens protein with glutamine synthetase domain	51557	GO:0005886|GO:0004356|GO:0006542	chr6	63989621	63989680	-	FALSE	hs|6q12	ENST00000370657	NM_016571	NM_016571	THC2477446	Hs.149585
AGS	A_33_P3264667	0.0170301	8.64515	2.78793	0	-1.61006	-1.61006	0.327586	P	P	A	A	CYP26C1	Homo sapiens cytochrome P450, family 26, subfamily C, polypeptide 1 (CYP26C1), mRNA [NM_183374]	cytochrome P450, family 26, subfamily C, polypeptide 1	340665	GO:0006805|GO:0005506|GO:0048284|GO:0044281|GO:0007417|GO:0009952|GO:0014032|GO:0048387|GO:0006766|GO:0034653|GO:0001972|GO:0005789|GO:0008401|GO:0016021|GO:0055114|GO:0020037	chr10	94824196	94824255	+	FALSE	hs|10q23.33	ENST00000285949	NM_183374	NM_183374	NP1247942	Hs.369993
AGS	A_21_P0004566	0.00712908	7.04787	2.94603	-1.19209e-07	-1.24189	-1.24189	0.422818	P	P	A	A	lnc-ARRDC3-1	LNCipedia lincRNA (lnc-ARRDC3-1), lincRNA [lnc-ARRDC3-1:6]	lnc-ARRDC3-1:6			chr5	90603571	90603630	-	FALSE	hs|5q14.3				THC2719986	Hs.440418
AGS	A_33_P3221498	0.0332718	9.44466	4.02231	0	-1.2177	-1.2177	0.429969	P	P	A	A	STK31	Homo sapiens serine/threonine kinase 31 (STK31), transcript variant 4, mRNA [NM_001260504]	serine/threonine kinase 31	56164	GO:0001669|GO:0004674|GO:0006468|GO:0005524	chr7	23871856	23871915	+	FALSE	hs|7p15.3	ENST00000405627	NM_001260504	NM_001260504	THC2463839	Hs.309767
AGS	A_23_P80954	0.0353506	7.84836	3.39491	-1.19209e-07	-1.20278	-1.20278	0.434437	P	P	A	A	SLC26A1	Homo sapiens solute carrier family 26 (anion exchanger), member 1 (SLC26A1), transcript variant 1, mRNA [NM_022042]	solute carrier family 26 (anion exchanger), member 1	10861	GO:0006821|GO:0006805|GO:0050427|GO:0019531|GO:0005886|GO:0050428|GO:0005975|GO:0019532|GO:0044281|GO:0055085|GO:0015116|GO:0005887|GO:0015108|GO:0015301|GO:0008272|GO:0009405|GO:0008271|GO:0016021|GO:0030203|GO:0006811	chr4	982406	982465	-	FALSE	hs|4p16.3	ENST00000398516	NM_022042	NM_022042	THC2477659	Hs.658244
AGS	A_33_P3227231	0.0152704	7.38055	3.16014	0	-1.19761	-1.19761	0.435997	P	P	A	A	LOC155060	Homo sapiens cDNA FLJ61016 complete cds. [AK303492]	AI894139 pseudogene	155060		chr7	148990798	148990857	+	FALSE	hs|7q36.1	ENST00000481817	AK303492		THC2532444	Hs.490512
AGS	A_21_P0000746	0.0160237	7.59996	3.54393	0	-1.08044	-1.08044	0.472885	P	P	A	A	LINC00933	Homo sapiens long intergenic non-protein coding RNA 933 (LINC00933), transcript variant 1, long non-coding RNA [NR_038273]	long intergenic non-protein coding RNA 933	100506874		chr15	85123195	85123254	+	FALSE	hs|15q25.2	ENST00000557887		NR_038273	THC2519635	Hs.150824
HGC27	A_33_P3629678	0.00259045	1365.26	3204.47	0	1.23121	1.23121	2.34764	P	P	P	P	COL5A1	Homo sapiens collagen, type V, alpha 1 (COL5A1), transcript variant 1, mRNA [NM_000093]	collagen, type V, alpha 1	1289	GO:0035313|GO:0048592|GO:0005588|GO:0035989|GO:0046872|GO:0022617|GO:0007411|GO:0030198|GO:0030199|GO:0030574|GO:0045112|GO:0043206|GO:0007155|GO:0008201|GO:0070062|GO:0001568|GO:0048407|GO:0043394|GO:0005576|GO:0005604|GO:0031012|GO:0003007|GO:0005178|GO:0016477|GO:0051128|GO:0005788|GO:0043588|GO:0032964|GO:0005201	chr9	137736327	137736386	+	FALSE	hs|9q34.3	ENST00000618395	NM_000093	NM_000093	THC2469461	Hs.210283
HGC27	A_33_P3251093	0.00883883	294.551	681.278	0	1.20926	1.20926	2.31219	P	P	P	P	SLC36A1	Homo sapiens solute carrier family 36 (proton/amino acid symporter), member 1 (SLC36A1), mRNA [NM_078483]	solute carrier family 36 (proton/amino acid symporter), member 1	206358	GO:0005280|GO:0005886|GO:0005783|GO:0015078|GO:0006865|GO:0005765|GO:0055085|GO:0015180|GO:0015193|GO:0015816|GO:0035524|GO:0015187|GO:0016021|GO:0015808|GO:0006811|GO:0015992	chr5	150871862	150871921	+	FALSE	hs|5q33.1	ENST00000243389	NM_078483	NM_078483	THC2642881	Hs.269004
HGC27	A_32_P358887	0.00610464	50.8909	116.223	0	1.19269	1.19269	2.28578	P	P	P	P	SLC4A4	Homo sapiens solute carrier family 4 (sodium bicarbonate cotransporter), member 4 (SLC4A4), transcript variant 2, mRNA [NM_003759]	solute carrier family 4 (sodium bicarbonate cotransporter), member 4	8671	GO:0005515|GO:0005886|GO:0055085|GO:0016323|GO:0005452|GO:0005887|GO:0006810|GO:0015701|GO:0051453|GO:0035725|GO:0008510|GO:0006811|GO:0070062	chr4	72437442	72437501	+	FALSE	hs|4q13.3	ENST00000340595	NM_003759	NM_003759	THC2558403	Hs.5462
HGC27	A_33_P3349651	0.00255407	165.377	362.984	0	1.13054	1.13054	2.18941	P	P	P	P	SWAP70	Homo sapiens SWAP switching B-cell complex 70kDa subunit (SWAP70), transcript variant 1, mRNA [NM_015055]	SWAP switching B-cell complex 70kDa subunit	23075	GO:0005737|GO:0005886|GO:0045190|GO:0005509|GO:0005634|GO:0005524|GO:0003677|GO:0030027	chr11	9774221	9774280	+	FALSE	hs|11p15.4	ENST00000318950	NM_015055	NM_015055	THC2671343	Hs.153026
HGC27	A_23_P83818	0.0285593	162.45	352.12	0	1.11619	1.11619	2.16774	P	P	P	P	COL5A1	Homo sapiens collagen, type V, alpha 1 (COL5A1), transcript variant 1, mRNA [NM_000093]	collagen, type V, alpha 1	1289	GO:0035313|GO:0048592|GO:0005588|GO:0035989|GO:0046872|GO:0022617|GO:0007411|GO:0030198|GO:0030199|GO:0030574|GO:0045112|GO:0043206|GO:0007155|GO:0008201|GO:0070062|GO:0001568|GO:0048407|GO:0043394|GO:0005576|GO:0005604|GO:0031012|GO:0003007|GO:0005178|GO:0016477|GO:0051128|GO:0005788|GO:0043588|GO:0032964|GO:0005201	chr9	137734063	137734122	+	FALSE	hs|9q34.3	ENST00000618395	NM_000093	NM_000093	THC2472528	Hs.210283
HGC27	A_23_P99397	0.0140899	128.117	274.881	0	1.09286	1.09286	2.13297	P	P	P	P	ZDHHC20	Homo sapiens zinc finger, DHHC-type containing 20 (ZDHHC20), transcript variant 1, mRNA [NM_153251]	zinc finger, DHHC-type containing 20	253832	GO:0018345|GO:0016020|GO:0005886|GO:0016409|GO:0008270|GO:0016021|GO:0019706	chr13	21950585	21950644	-	FALSE	hs|13q12.11	ENST00000464055	NM_153251	NM_153251	THC2479744	Hs.564611
HGC27	A_22_P00002593	0.0136204	6.93704	14.2899	0	1.03896	1.03896	2.05474	P	P	P	P						chr19	51289199	51289258	-	FALSE	hs|19q13.33	ENST00000562076	GQ868703			Hs.606943
HGC27	A_33_P3322834	0.043504	12.1481	24.9586	0	1.03642	1.03642	2.05113	P	P	P	P	CSRNP3	Homo sapiens cysteine-serine-rich nuclear protein 3 (CSRNP3), transcript variant 1, mRNA [NM_001172173]	cysteine-serine-rich nuclear protein 3	80034	GO:0043565|GO:0043065|GO:0003700|GO:0045944|GO:0010923|GO:0006915|GO:0005634|GO:0001228|GO:0006351	chr2	166536589	166536648	+	FALSE	hs|2q24.3	ENST00000314499	NM_001172173	NM_001172173	THC2476971	Hs.470479
HGC27	A_33_P3328026	0.0135126	370.649	761.413	0	1.03272	1.03272	2.04588	P	P	P	P	CDK19	Homo sapiens cyclin-dependent kinase 19 (CDK19), transcript variant 1, mRNA [NM_015076]	cyclin-dependent kinase 19	23097	GO:0051726|GO:0006468|GO:0005524|GO:0004693	chr6	110931236	110931295	-	FALSE	hs|6q21	ENST00000368911	NM_015076	NM_015076	THC2509933	Hs.744895
HGC27	A_21_P0005226	0.036074	1.34596	32.3868	0	4.54974	4.54974	23.4212	A	A	P	P	lnc-ANLN-4	LNCipedia lincRNA (lnc-ANLN-4), lincRNA [lnc-ANLN-4:1]	lnc-ANLN-4:1			chr7	36880919	36880978	+	FALSE	hs|7p14.2					Hs.511293
HGC27	ERCC-00079_170	0.00623495	2.50263	7.64515	0	1.61018	1.61018	3.0529	A	A	P	P										pos
HGC27	A_22_P00004700	0.0108019	3.74642	9.3319	0	1.31054	1.31054	2.48034	A	A	P	P	LOC102724301	Homo sapiens uncharacterized LOC102724301 (LOC102724301), long non-coding RNA [NR_120587]	uncharacterized LOC102724301	102724301		chr11	119604397	119604456	+	FALSE	hs|11q23.3		NR_120587	NR_120587	THC2679352	Hs.637640
HGC27	A_24_P162454	0.0252781	3.12472	7.09719	0	1.18578	1.18578	2.27486	A	A	P	P	PABPC1L2B	Homo sapiens poly(A) binding protein, cytoplasmic 1-like 2B (PABPC1L2B), mRNA [NM_001042506]	poly(A) binding protein, cytoplasmic 1-like 2B	645974	GO:0000166|GO:0003723|GO:0070062	chrX	72225172	72225231	+	FALSE	hs|Xq13.2	ENST00000373521	NM_001042506	NM_001042506	THC2609848	Hs.567854
HGC27	A_22_P00012438	0.0159956	3.12786	6.53235	0	1.05743	1.05743	2.08122	A	A	P	P	LINC01529	Homo sapiens long intergenic non-protein coding RNA 1529 (LINC01529), long non-coding RNA [NR_104176]	long intergenic non-protein coding RNA 1529	644050		chr19	36282685	36282744	-	FALSE	hs|19q13.12	ENST00000564335	NR_104176	NR_104176	THC2637220	Hs.651888
HGC27	A_23_P69493	7.19396e-05	2768.66	114.578	0	-4.59662	-4.59662	0.0413312	P	P	P	P	RHOA	Homo sapiens ras homolog family member A (RHOA), mRNA [NM_001664]	ras homolog family member A	387	GO:0044319|GO:0005515|GO:0042346|GO:0033688|GO:0043931|GO:0030036|GO:0030054|GO:0005886|GO:0007264|GO:0003924|GO:0007266|GO:0032154|GO:0036089|GO:0005829|GO:0043297|GO:0043296|GO:0007411|GO:0016032|GO:0007179|GO:0090307|GO:0043123|GO:0005856|GO:0005938|GO:0070062|GO:0030334|GO:0051056|GO:0048010|GO:0048011|GO:0048013|GO:0032467|GO:0048015|GO:0050919|GO:0030168|GO:0030496|GO:0061383|GO:0005525|GO:…	chr3	49397212	49397271	-	FALSE	hs|3p21.31	ENST00000418115	NM_001664	NM_001664	THC2551232	Hs.247077
HGC27	A_23_P128408	0.00284336	538.973	258.598	0	-1.06319	-1.06319	0.478573	P	P	P	P	TRIAP1	Homo sapiens TP53 regulated inhibitor of apoptosis 1 (TRIAP1), mRNA [NM_016399]	TP53 regulated inhibitor of apoptosis 1	51499	GO:0005515|GO:0043066|GO:0048471|GO:0030330|GO:0097035|GO:0005739|GO:0002039|GO:0005758|GO:0043234|GO:0034644|GO:0090201|GO:0015914|GO:0045944|GO:2001140|GO:0043154|GO:0006977	chr12	120882024	120882083	-	FALSE	hs|12q24.31	ENST00000546954	NM_016399	NM_016399	THC2619347	Hs.69499
HGC27	A_33_P3741059	0.0456556	24.2413	11.6292	0	-1.05838	-1.05838	0.480169	P	P	P	P		Homo sapiens mRNA; cDNA DKFZp667K053 (from clone DKFZp667K053). [AL832882]				chr1	117035660	117035719	-	FALSE	hs|1p13.1	ENST00000456414	AL832882		THC2636481	Hs.734297
HGC27	A_23_P215634	0.0237666	300.959	147.959	0	-1.02527	-1.02527	0.491318	P	P	P	P	IGFBP3	Homo sapiens insulin-like growth factor binding protein 3 (IGFBP3), transcript variant 1, mRNA [NM_001013398]	insulin-like growth factor binding protein 3	3486	GO:0005515|GO:0008285|GO:0031994|GO:0031995|GO:0005634|GO:0005615|GO:0001558|GO:0046872|GO:0010906|GO:0014912|GO:0008160|GO:0044342|GO:0009968|GO:0001968|GO:0070062|GO:0005520|GO:0043065|GO:0006915|GO:0048662|GO:0005576|GO:0043085|GO:0001649|GO:0016942|GO:0043568|GO:0045663|GO:0043567|GO:0001933|GO:0006468|GO:0043410|GO:0044267	chr7	45952608	45952667	-	FALSE	hs|7p12.3	ENST00000275521	NM_001013398	NM_001013398	NP1147610	Hs.450230
HGC27	A_21_P0007462	0.00346021	20.4245	1.477	0	-3.80104	-3.80104	0.0717418	P	P	A	A	lnc-CPSF7-1	LNCipedia lincRNA (lnc-CPSF7-1), lincRNA [lnc-CPSF7-1:1]	lnc-CPSF7-1:1			chr11	61215902	61215961	-	FALSE	hs|11q12.2
HGC27	A_22_P00022242	0.0108746	12.5702	1.24731	0	-3.32375	-3.32375	0.0998737	P	P	A	A	lnc-AL020996.1-2	Homo sapiens cDNA FLJ35672 fis, clone SPLEN2018280. [AK092991]	lnc-AL020996.1-2:1			chr1	25971950	25972009	-	FALSE	hs|1p36.11		AK092991		THC2523550	Hs.665175
HGC27	A_33_P3342938	0.0159008	16.0226	3.00577	1.19209e-07	-2.43594	-2.43594	0.184803	P	P	A	A	MEIS1	Meis homeobox 1 [Source:HGNC Symbol;Acc:HGNC:7000] [ENST00000409622]	Meis homeobox 1	4211	GO:0005515|GO:0005667|GO:0046982|GO:0006366|GO:0003705|GO:0060216|GO:0005634|GO:0001525|GO:0000978|GO:0001077|GO:0035855|GO:0002089|GO:0045665|GO:0045638|GO:0045944|GO:0003682	chr2	66667364	66667423	+	FALSE	hs|2p14	ENST00000409622	AK098174		THC2554490	Hs.526754
HGC27	A_33_P3402823	0.0169713	12.4345	4.11575	0	-1.59184	-1.59184	0.331748	P	P	A	A	SPIN3	Homo sapiens spindlin family, member 3 (SPIN3), transcript variant 1, mRNA [NM_001010862]	spindlin family, member 3	169981	GO:0007276	chrX	57021163	57021222	-	FALSE	hs|Xp11.21	ENST00000374919	NM_001010862	NM_001010862	THC2618315	Hs.522672
HGC27	A_22_P00004183	0.0246571	7.5846	3.00614	1.19209e-07	-1.33937	-1.33937	0.395193	P	P	A	A						chr5	157653313	157653372	-	FALSE	hs|5q33.3	ENST00000523178
HGC27	A_21_P0009697	0.0480896	8.5198	4.0624	0	-1.05745	-1.05745	0.480479	P	P	A	A	lnc-ZNF730-1	LNCipedia lincRNA (lnc-ZNF730-1), lincRNA [lnc-ZNF730-1:1]	lnc-ZNF730-1:1			chr19	23290726	23290785	+	FALSE	hs|19p12
HGC27	A_33_P3351944	0.0165678	8.97441	4.39107	0	-1.0377	-1.0377	0.487103	P	P	A	A	EGFR	Homo sapiens epidermal growth factor receptor (EGFR), transcript variant 3, mRNA [NM_201283]	epidermal growth factor receptor	1956	GO:0005515|GO:0042698|GO:0033590|GO:0005615|GO:0006412|GO:0033594|GO:0042802|GO:0005006|GO:0016337|GO:0021795|GO:0001948|GO:0003690|GO:0007173|GO:0000165|GO:0007411|GO:0007611|GO:0042743|GO:0001942|GO:0004709|GO:0006979|GO:0031625|GO:0031965|GO:0030335|GO:0019901|GO:0009986|GO:0030122|GO:0019903|GO:0042059|GO:0006950|GO:0001892|GO:0018108|GO:0001889|GO:0005178|GO:0001503|GO:0008543|GO:0005789|GO:…	chr7	55224558	55224617	+	FALSE	hs|7p11.2	ENST00000420316	NM_201283	NM_201283	THC2699456	Hs.488293
HGC27	A_21_P0014938	0.0401464	9.24955	4.55815	1.19209e-07	-1.01921	-1.01921	0.493386	P	P	A	A						chr5	151042535	151042594	+	FALSE	hs|5q33.1				THC2498688
HGC27	A_23_P419156	0.000465181	6.52048	3.2311	-1.19209e-07	-1.01578	-1.01578	0.494561	P	P	A	A	OPN1SW	Homo sapiens opsin 1 (cone pigments), short-wave-sensitive (OPN1SW), mRNA [NM_001708]	opsin 1 (cone pigments), short-wave-sensitive	611	GO:0018298|GO:0007165|GO:0009881|GO:0007603|GO:0007186|GO:0042622|GO:0005887|GO:0004930|GO:0004872|GO:0007602|GO:0007601|GO:0001523	chr7	128414603	128414662	-	FALSE	hs|7q32.1	ENST00000249389	NM_001708	NM_001708	THC2481006	Hs.656404
CCK81	A_23_P119196	0.0170632	70.0795	199.193	0	1.52462	1.52462	2.87712	P	P	P	P	KLF2	Homo sapiens Kruppel-like factor 2 (KLF2), mRNA [NM_016270]	Kruppel-like factor 2	10365	GO:0051247|GO:0005515|GO:0071499|GO:0070301|GO:0003700|GO:0032715|GO:0005634|GO:0071409|GO:0001701|GO:0046872|GO:0006351|GO:0060509|GO:0043565|GO:0000902|GO:0043249|GO:0035264|GO:0045944|GO:0071356|GO:0071347|GO:0040029|GO:0036003	chr19	16438246	16438305	+	FALSE	hs|19p13.11	ENST00000248071	NM_016270	NM_016270	THC2467900	Hs.744182
CCK81	A_33_P3317460	0.0211206	7.82159	17.714	0	1.1941	1.1941	2.28802	P	P	P	P						chr2	132056255	132056314	-	FALSE	hs|2q21.1
CCK81	A_33_P3398862	0.00252889	79.0456	156.786	0	1.00654	1.00654	2.00909	P	P	P	P	RHOB	ras homolog family member B [Source:HGNC Symbol;Acc:HGNC:668] [ENST00000272233]	ras homolog family member B	388	GO:0005515|GO:0070301|GO:0005886|GO:0007264|GO:0006927|GO:0003924|GO:0005634|GO:0007266|GO:0006886|GO:0032154|GO:0005829|GO:0000910|GO:0007411|GO:0007155|GO:0070062|GO:0051056|GO:0043065|GO:0008333|GO:0006915|GO:0030168|GO:0001525|GO:0045786|GO:0005525|GO:0071479|GO:0045766|GO:0007596|GO:0008152|GO:0031902|GO:0019003|GO:0005925|GO:0005769|GO:0010008	chr2	20648584	20648643	+	FALSE	hs|2p24.1	ENST00000272233	AK309991		THC2711134	Hs.502876
CCK81	A_23_P154050	0.00551919	1.23524	7.3017	0	2.58327	2.58327	5.99295	A	A	P	P	CDK15	Homo sapiens cyclin-dependent kinase 15 (CDK15), transcript variant 3, mRNA [NM_139158]	cyclin-dependent kinase 15	65061	GO:0005515|GO:0051726|GO:0006468|GO:0005524|GO:0046872|GO:0004693	chr2	202700454	202712130	+	FALSE	hs|2q33.1	ENST00000451080	NM_139158	NM_139158	THC2475754	Hs.348711
CCK81	A_24_P925062	0.044274	2.92552	10.0745	0	1.79834	1.79834	3.47821	A	A	P	P	MXRA7	Homo sapiens matrix-remodelling associated 7 (MXRA7), transcript variant 1, mRNA [NM_001008528]	matrix-remodelling associated 7	439921	GO:0016021	chr17	74672438	74672497	-	FALSE	hs|17q25.1	ENST00000355797	NM_001008528	NM_001008528	THC2495087	Hs.250723
CCK81	A_23_P22660	0.0048263	3.13264	7.99307	0	1.36733	1.36733	2.57993	A	A	P	P	CYSLTR1	Homo sapiens cysteinyl leukotriene receptor 1 (CYSLTR1), transcript variant 3, mRNA [NM_006639]	cysteinyl leukotriene receptor 1	10800	GO:0005515|GO:0005886|GO:0007585|GO:0006952|GO:0004974|GO:0007204|GO:0045766|GO:0006954|GO:0045907|GO:0006935|GO:0007186|GO:0016020|GO:0005887|GO:0006816	chrX	77528705	77528764	-	FALSE	hs|Xq21.1	ENST00000614798	NM_006639	NM_006639	THC2477665	Hs.733809
CCK81	A_21_P0004206	0.0200687	2.75707	6.28982	-2.38419e-07	1.20913	1.20913	2.31198	A	A	P	P	lnc-C5orf38-3	LNCipedia lincRNA (lnc-C5orf38-3), lincRNA [lnc-C5orf38-3:1]	lnc-C5orf38-3:1			chr5	2965474	2965533	+	FALSE	hs|5p15.33				THC2681894
CCK81	A_23_P49145	0.0117391	3.57906	8.14848	0	1.20128	1.20128	2.29943	A	A	P	P	ZG16	Homo sapiens zymogen granule protein 16 (ZG16), mRNA [NM_152338]	zymogen granule protein 16	653808	GO:0031012|GO:0042589|GO:0005796|GO:0005578|GO:0030246|GO:0060205|GO:0015031	chr16	29791761	29791821	+	FALSE	hs|16p11.2	ENST00000400752	NM_152338	NM_152338	NP1158568	Hs.632195
CCK81	A_21_P0006162	0.036943	4.23609	8.46073	0	1.01862	1.01862	2.02598	A	A	P	P	lnc-NTRK2-3	DB077982 TESTI4 Homo sapiens cDNA clone TESTI4022703 5', mRNA sequence [DB077982]	lnc-NTRK2-3:1			chr9	87112444	87112503	+	FALSE	hs|9q21.33				THC2632479	Hs.584302
CCK81	A_23_P69493	0.0465363	3833.16	560.695	0	-2.77356	-2.77356	0.146243	P	P	P	P	RHOA	Homo sapiens ras homolog family member A (RHOA), mRNA [NM_001664]	ras homolog family member A	387	GO:0044319|GO:0005515|GO:0042346|GO:0033688|GO:0043931|GO:0030036|GO:0030054|GO:0005886|GO:0007264|GO:0003924|GO:0007266|GO:0032154|GO:0036089|GO:0005829|GO:0043297|GO:0043296|GO:0007411|GO:0016032|GO:0007179|GO:0090307|GO:0043123|GO:0005856|GO:0005938|GO:0070062|GO:0030334|GO:0051056|GO:0048010|GO:0048011|GO:0048013|GO:0032467|GO:0048015|GO:0050919|GO:0030168|GO:0030496|GO:0061383|GO:0005525|GO:…	chr3	49397212	49397271	-	FALSE	hs|3p21.31	ENST00000418115	NM_001664	NM_001664	THC2551232	Hs.247077
CCK81	A_21_P0007825	0.0388521	372.392	70.4909	0	-2.39466	-2.39466	0.190166	P	P	P	P	lnc-DERA-1	LNCipedia lincRNA (lnc-DERA-1), lincRNA [lnc-DERA-1:1]	lnc-DERA-1:1			chr12	16573924	16573983	+	FALSE	hs|12p12.3
CCK81	A_32_P164246	0.0262126	41.9988	20.0679	0	-1.04337	-1.04337	0.485193	P	P	P	P	FOXQ1	Homo sapiens forkhead box Q1 (FOXQ1), mRNA [NM_033260]	forkhead box Q1	94234	GO:0043565|GO:0006366|GO:0006357|GO:0000981|GO:0005634|GO:0031069	chr6	1314629	1314688	+	FALSE	hs|6p25.3		NM_033260	NM_033260	THC2473229	Hs.591352
CCK81	A_23_P135381	0.0300514	31.8106	15.5479	0	-1.01301	-1.01301	0.495511	P	P	P	P	SP5	Homo sapiens Sp5 transcription factor (SP5), mRNA [NM_001003845]	Sp5 transcription factor	389058	GO:0043565|GO:0006355|GO:0060349|GO:0005634|GO:0046872|GO:0006351	chr2	171574290	171574349	+	FALSE	hs|2q31.1	ENST00000375281	NM_001003845	NM_001003845	THC2475515	Hs.368802
CCK81	A_22_P00025914	0.0412182	9.69893	3.54553	0	-1.4443	-1.4443	0.367469	P	P	A	A		PREDICTED: Homo sapiens uncharacterized LOC101927402 (LOC101927402), mRNA [XM_005264677]				chr2	64749679	64749738	-	FALSE	hs|2p14	ENST00000561559	XM_005264677	XM_005264677	THC2607546	Hs.187018
CCK81	A_21_P0002934	0.0448286	6.69927	2.54774	0	-1.37241	-1.37241	0.386245	P	P	A	A	lnc-OXNAD1-2	LNCipedia lincRNA (lnc-OXNAD1-2), lincRNA [lnc-OXNAD1-2:2]	lnc-OXNAD1-2:2			chr3	16581015	16581074	+	FALSE	hs|3p24.3
CCK81	A_21_P0007886	0.00712511	8.43508	3.71095	0	-1.16582	-1.16582	0.445711	P	P	A	A	lnc-RP11-181C3.1.1-1	LNCipedia lincRNA (lnc-RP11-181C3.1.1-1), lincRNA [lnc-RP11-181C3.1.1-1:5]	lnc-RP11-181C3.1.1-1:5			chr12	98887213	98897547	-	FALSE	hs|12q23.1
CCK81	A_33_P3218872	0.0100422	8.20706	3.84619	1.19209e-07	-1.0756	-1.0756	0.474475	P	P	A	A	METTL6	Homo sapiens methyltransferase like 6 (METTL6), transcript variant 1, mRNA [NM_152396]	methyltransferase like 6	131965	GO:0008168|GO:0032259	chr3	15451384	15451443	-	FALSE	hs|3p25.1		NM_152396	NM_152396	THC2636762	Hs.149487
CCK81	A_22_P00006143	0.0122759	7.48778	3.52181	1.19209e-07	-1.06988	-1.06988	0.476358	P	P	A	A	lnc-FAM189A1-3	Homo sapiens mRNA full length insert cDNA clone EUROIMAGE 295344. [AL109707]	lnc-FAM189A1-3:1			chr15	30020526	30020585	-	FALSE	hs|15q13.1		AL109707		THC2721572	Hs.658944
